# Supplementary material for: Synthesis, structure and spectroscopic properties of BODIPY dyes incorporating the pentafluorosulfanylphenyl group
Source: Royal Society of Chemistry journal article supplement (doi:10.1039/d3nj00633f), 2023-01-01
Supplement: d3nj00633f1.pdf [file d3nj00633f1.pdf]

## Supporting Information

### Synthesis, Structure and Spectroscopic Properties of BODIPY Dyes Incorporating the Pentafluorosulfanylphenyl Group

Richard D. James, Fabio Cucinotta, Paul G. Waddell and Andrew C. Benniston

Chemistry-School of Natural and Environmental Sciences, Newcastle University,  
Newcastle upon Tyne, NE1 7RU, UK.

#### Table of Contents

|                                                                                                                                                                                                                                                                                       |    |
|---------------------------------------------------------------------------------------------------------------------------------------------------------------------------------------------------------------------------------------------------------------------------------------|----|
| <b>Figure S1.</b> DFT calculated Kohn-Sham molecular orbitals using the B3LYP functional and the 6-311G(d,p) basis set for <b>BD3</b> .....                                                                                                                                           | 3  |
| <b>Table S1.</b> TD-DFT calculated parameters for the carboxylic acid version of <b>BD3</b> in vacuo...3                                                                                                                                                                              |    |
| <b>Figure S2.</b> DFT calculated Kohn-Sham molecular orbitals using the B3LYP functional and the 6-311G(d,p) basis set for <b>BD4</b> .....                                                                                                                                           | 4  |
| <b>Table S2.</b> TD-DFT calculated parameters for the carboxylic acid version of <b>BD4</b> in vacuo...4                                                                                                                                                                              |    |
| <b>Figure S3.</b> DFT calculated Kohn-Sham molecular orbitals using the B3LYP functional and the 6-311G(d,p) basis set for <b>BD5</b> .....                                                                                                                                           | 5  |
| <b>Table S3.</b> TD-DFT calculated parameters for the carboxylic acid version of <b>BD5</b> in vacuo...5                                                                                                                                                                              |    |
| <b>Figure S4.</b> DFT calculated Kohn-Sham molecular orbitals using the B3LYP functional and the 6-311G(d,p) basis set for <b>BD6</b> .....                                                                                                                                           | 6  |
| <b>Table S4.</b> TD-DFT calculated parameters for the carboxylic acid version of <b>BD6</b> in vacuo...6                                                                                                                                                                              |    |
| <b>Figure S5.</b> (A) Absorption and emission spectra recorded for <b>BD1</b> in CH <sub>3</sub> CN at room temperature. (B) Fluorescence decay trace (top) and instrument response function (bottom) measured for <b>BD1</b> in CH <sub>3</sub> CN using single-photon-counting..... | 7  |
| <b>Figure S6.</b> (A) Absorption and emission spectra recorded for <b>BD2</b> in CH <sub>3</sub> CN at room temperature. (B) Fluorescence decay trace (top) and instrument response function (bottom) measured for <b>BD2</b> in CH <sub>3</sub> CN using single-photon-counting..... | 8  |
| <b>Figure S7.</b> Absorption and emission spectra recorded for <b>BD3</b> in CH <sub>3</sub> CN at room temperature.....                                                                                                                                                              | 9  |
| <b>Figure S8.</b> Absorption and emission spectra recorded for <b>BD4</b> in CH <sub>3</sub> CN at room temperature.....                                                                                                                                                              | 10 |
| <b>Figure S9.</b> Absorption and emission spectra recorded for <b>BD5</b> in CH <sub>3</sub> CN at room temperature.....                                                                                                                                                              | 11 |
| <b>Figure S10.</b> Absorption and emission spectra recorded for <b>BD6</b> in CH <sub>3</sub> CN at room temperature.....                                                                                                                                                             | 12 |
| <b>Figure S11.</b> Absorption and emission spectra recorded for <b>BD4</b> (a and b), <b>BD5</b> (c and d) and <b>BD6</b> (e and f) in a range of solvents at room temperature.....                                                                                                   | 13 |
| <b>Figure S12.</b> Plots of absorption maxima and emission maxima versus the solvent polarizability function for <b>BD4</b> (a and b), <b>BD5</b> (c and d) and <b>BD6</b> (e and f).....                                                                                             | 14 |
| <b>Figure S13.</b> Catalán's Solvent Polarity (SPP) and Lippert Mataga plots for <b>BD4</b> (top), <b>BD5</b> (middle) and <b>BD6</b> (bottom).....                                                                                                                                   | 15 |

|                                                                                                                                                                                                   |    |
|---------------------------------------------------------------------------------------------------------------------------------------------------------------------------------------------------|----|
| <b>Figure S14.</b> (a) Excitation spectrum measured at 650 nm, (b) fluorescence spectrum using 480 nm excitation and (c) fluorescence lifetime decay for a crystalline sample of <b>BD1</b> ..... | 16 |
| <b>Figure S15.</b> (a) Excitation spectrum measured at 630 nm, (b) fluorescence spectrum using 400 nm excitation and (c) fluorescence lifetime decay for a crystalline sample of <b>BD2</b> ..... | 17 |
| <b>Figure S16.</b> Representation of planes, angles and distances with regard to the electronic transition dipoles (red) for <b>BD1</b> as obtained from the crystal packing diagram.....         | 18 |
| <b>Figure S17.</b> Representation of a dimer for <b>BD1</b> and separation distance as obtained from the crystal packing diagram.....                                                             | 19 |
| <b>Figure S18.</b> Representation of an offset face-to-face dimer for <b>BD1</b> and separation distance as obtained from the crystal packing diagram.....                                        | 20 |
| <b>Figure S19.</b> Representation of a dimer for <b>BD1</b> between separate stacks and the separation distance and angles as obtained from the crystal packing diagram.....                      | 21 |
| <b>Figure S20.</b> Representation of an offset co-linear dimer for <b>BD1</b> and separation distance and offset angle as obtained from the crystal packing diagram.....                          | 22 |
| <b>Figure S21.</b> Representation of dimers for <b>BD2</b> and separation distance as obtained from the crystal packing diagram.....                                                              | 23 |
| <b>Figure S22.</b> Representation of pseudo co-linear dimers for <b>BD2</b> and their separation distances as obtained from the crystal packing diagram. View is down the c-axis.....             | 24 |
| <b>Figure S23.</b> A 300 MHz $^1\text{H}$ NMR spectrum of <b>2</b> recorded in $\text{CDCl}_3$ .....                                                                                              | 25 |
| <b>Figure S24.</b> A 176 MHz $^{13}\text{C}\{^1\text{H}\}$ NMR spectrum of <b>2</b> recorded in $\text{CDCl}_3$ .....                                                                             | 26 |
| <b>Figure S25.</b> A 282 MHz $^{19}\text{F}$ NMR spectrum of <b>2</b> recorded in $\text{CDCl}_3$ .....                                                                                           | 27 |
| <b>Figure S26.</b> A 300 MHz $^1\text{H}$ NMR spectrum of <b>BD2</b> recorded in $\text{CDCl}_3$ .....                                                                                            | 28 |
| <b>Figure S27.</b> A 176 MHz $^{13}\text{C}\{^1\text{H}\}$ NMR spectrum of <b>BD2</b> recorded in $\text{CDCl}_3$ .....                                                                           | 29 |
| <b>Figure S28.</b> A 300 MHz $^1\text{H}$ NMR spectrum of <b>BD3</b> recorded in $\text{CDCl}_3$ .....                                                                                            | 30 |
| <b>Figure S29.</b> A 75 MHz $^{13}\text{C}\{^1\text{H}\}$ NMR spectrum of <b>BD3</b> recorded in $\text{CDCl}_3$ .....                                                                            | 31 |
| <b>Figure S30.</b> A 700 MHz $^1\text{H}$ NMR spectrum of <b>BD5</b> recorded in $\text{CDCl}_3$ .....                                                                                            | 32 |
| <b>Figure S31.</b> A 176 MHz $^{13}\text{C}\{^1\text{H}\}$ NMR spectrum of <b>BD5</b> recorded in $\text{CDCl}_3$ .....                                                                           | 33 |
| <b>Figure S32.</b> A 700 MHz $^1\text{H}$ NMR spectrum of <b>BD6</b> recorded in $\text{CDCl}_3$ .....                                                                                            | 34 |
| <b>Figure S33.</b> A 176 MHz $^{13}\text{C}\{^1\text{H}\}$ NMR spectrum of <b>BD6</b> recorded in $\text{CDCl}_3$ .....                                                                           | 35 |
| <b>Figure S34.</b> A 659 MHz $^{19}\text{F}$ NMR spectrum of <b>BD6</b> recorded in $\text{CDCl}_3$ .....                                                                                         | 36 |
| <b>Figure S35.</b> A 96 MHz $^{11}\text{B}$ NMR spectrum of <b>BD6</b> recorded in $\text{CDCl}_3$ .....                                                                                          | 37 |
| <b>Figure S36.</b> TOF mass spectrum of <b>BD3</b> and the comparison of calculated and observed data.....                                                                                        | 38 |
| <b>Figure S37.</b> TOF mass spectrum of <b>BD6</b> and the comparison of calculated and observed data.....                                                                                        | 39 |

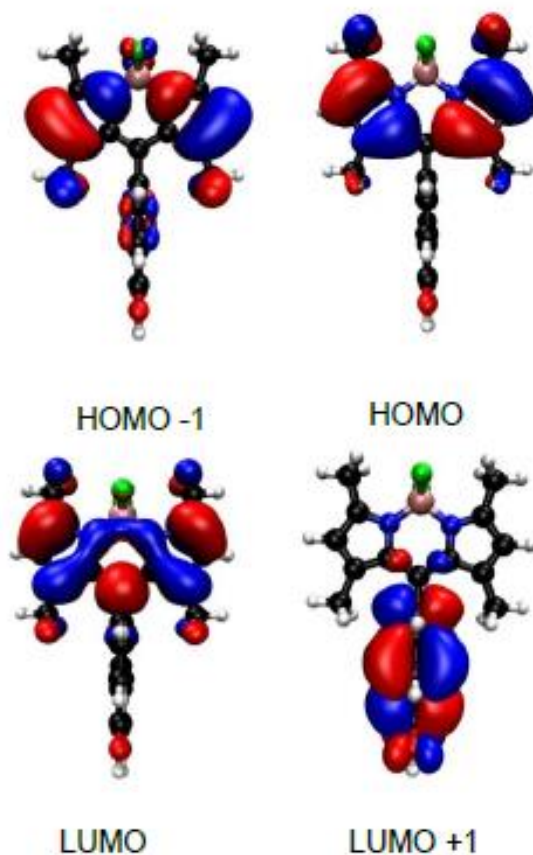

**Figure S1.** DFT calculated Kohn-Sham molecular orbitals using the B3LYP functional and the 6-311G(d,p) basis set for **BD3**.

**Table S1.** TD-DFT calculated parameters for the carboxylic acid version of **BD3** in vacuo.

| Electronic Transition<br>(oscillator strength) | Energy /<br>eV (nm) | Orbitals      | % Contribution |
|------------------------------------------------|---------------------|---------------|----------------|
| 1 (0.6354)                                     | 2.85 (434)          | HOMO → LUMO   | 100            |
| 2 (0.0498))                                    | 3.87 (320)          | HOMO-1 → LUMO | 100            |
| 3 (0.0002)                                     | 4.28 (290)          | HOMO → LUMO+1 | 100            |

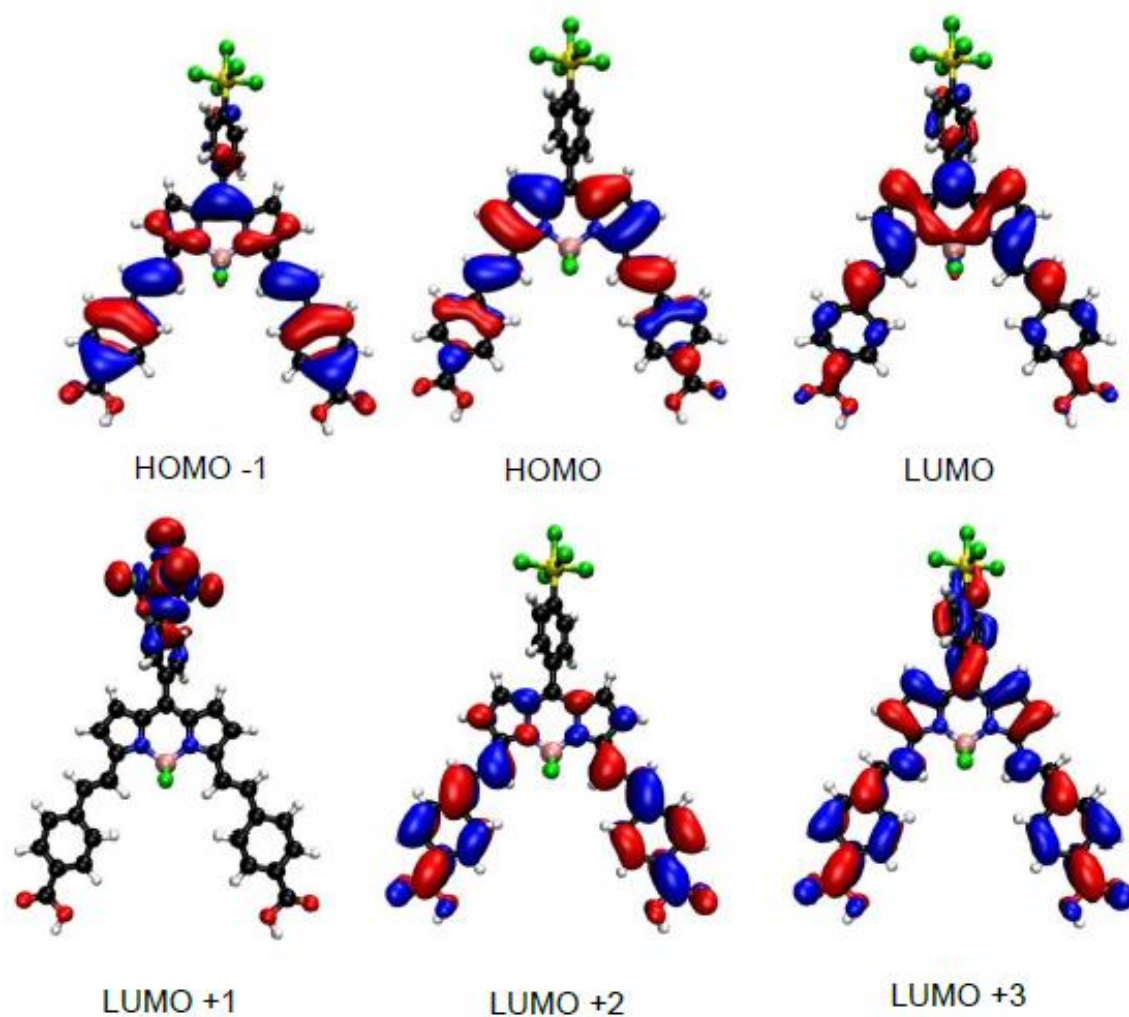

**Figure S2.** DFT calculated Kohn-Sham molecular orbitals using the B3LYP functional and the 6-311G(d,p) basis set for **BD4**.

**Table S2.** TD-DFT calculated parameters for the carboxylic acid version of **BD4** in vacuo.

| Electronic Transition<br>(oscillator strength) | Energy /<br>eV (nm) | Orbitals        | % Contribution |
|------------------------------------------------|---------------------|-----------------|----------------|
| 1 (1.1086)                                     | 2.12 (586)          | HOMO → LUMO     | 100            |
| 2 (2.1656)                                     | 3.54 (351)          | HOMO-1 → LUMO   | 79             |
|                                                |                     | HOMO → LUMO+2   | 21             |
| 3 (0.1365)                                     | 3.67 (338)          | HOMO → LUMO+2   | 74             |
|                                                |                     | HOMO-1 → LUMO   | 22             |
|                                                |                     | HOMO-1 → LUMO+3 | 4              |

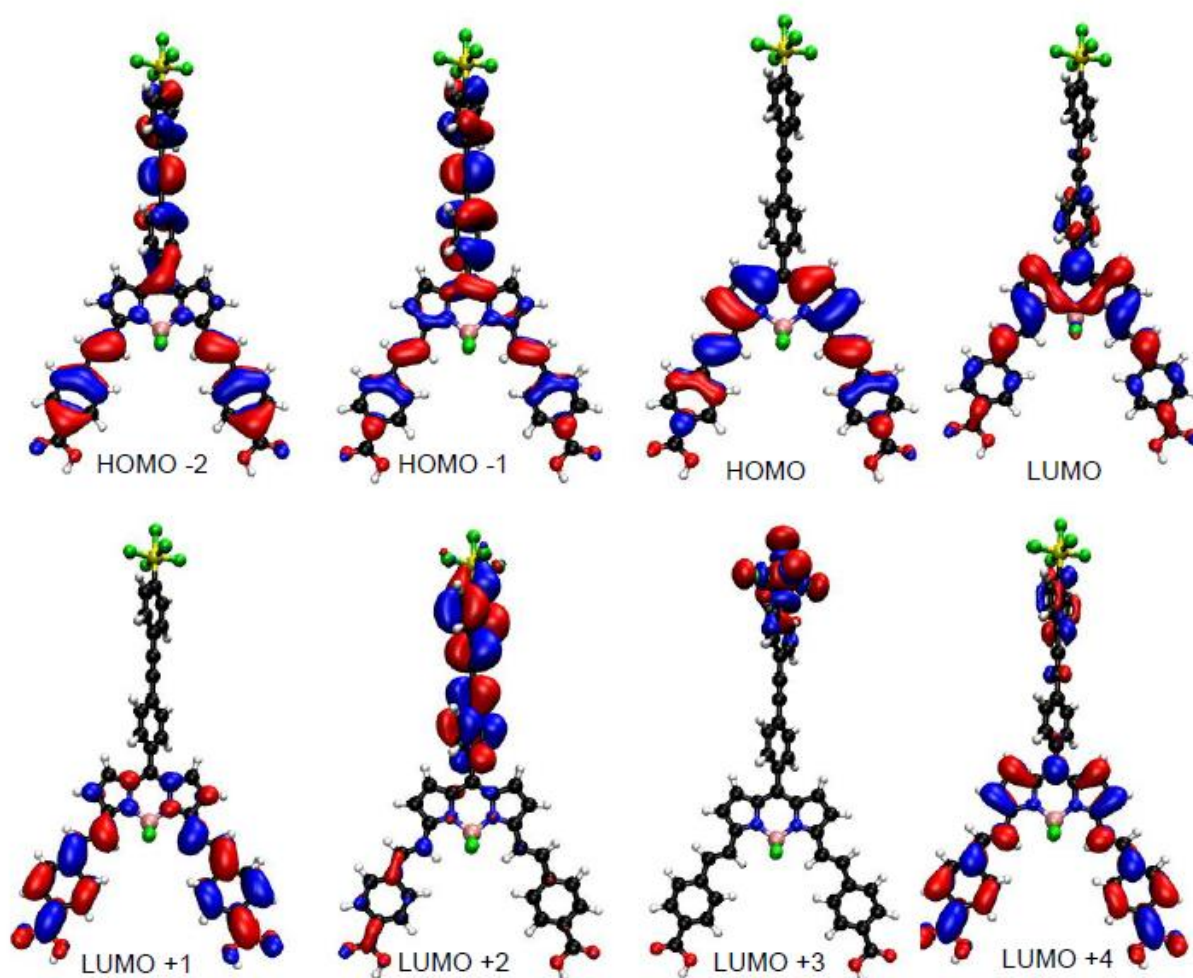

**Figure S3.** DFT calculated Kohn-Sham molecular orbitals using the B3LYP functional and the 6-311G(d,p) basis set for **BD5**.

**Table S3.** TD-DFT calculated parameters for the carboxylic acid version of **BD5** in vacuo.

| Electronic Transition<br>(oscillator strength) | Energy /<br>eV (nm) | Orbitals        | % Contribution |
|------------------------------------------------|---------------------|-----------------|----------------|
| 1 (1.0604)                                     | 2.23 (556)          | HOMO → LUMO     | 100            |
| 2 (2.2145)                                     | 3.40 (365)          | HOMO-1 → LUMO   | 86             |
|                                                |                     | HOMO → LUMO+1   | 5              |
|                                                |                     | HOMO-2 → LUMO   | 3              |
|                                                |                     | HOMO-2 → LUMO+2 | 3              |
|                                                |                     | HOMO-1 → LUMO+2 | 3              |
| 3 (0.5933)                                     | 3.79 (327)          | HOMO → LUMO+1   | 89             |
|                                                |                     | HOMO-1 → LUMO   | 5              |
|                                                |                     | HOMO-1 → LUMO+4 | 3              |
|                                                |                     | HOMO-2 → LUMO+4 | 2              |

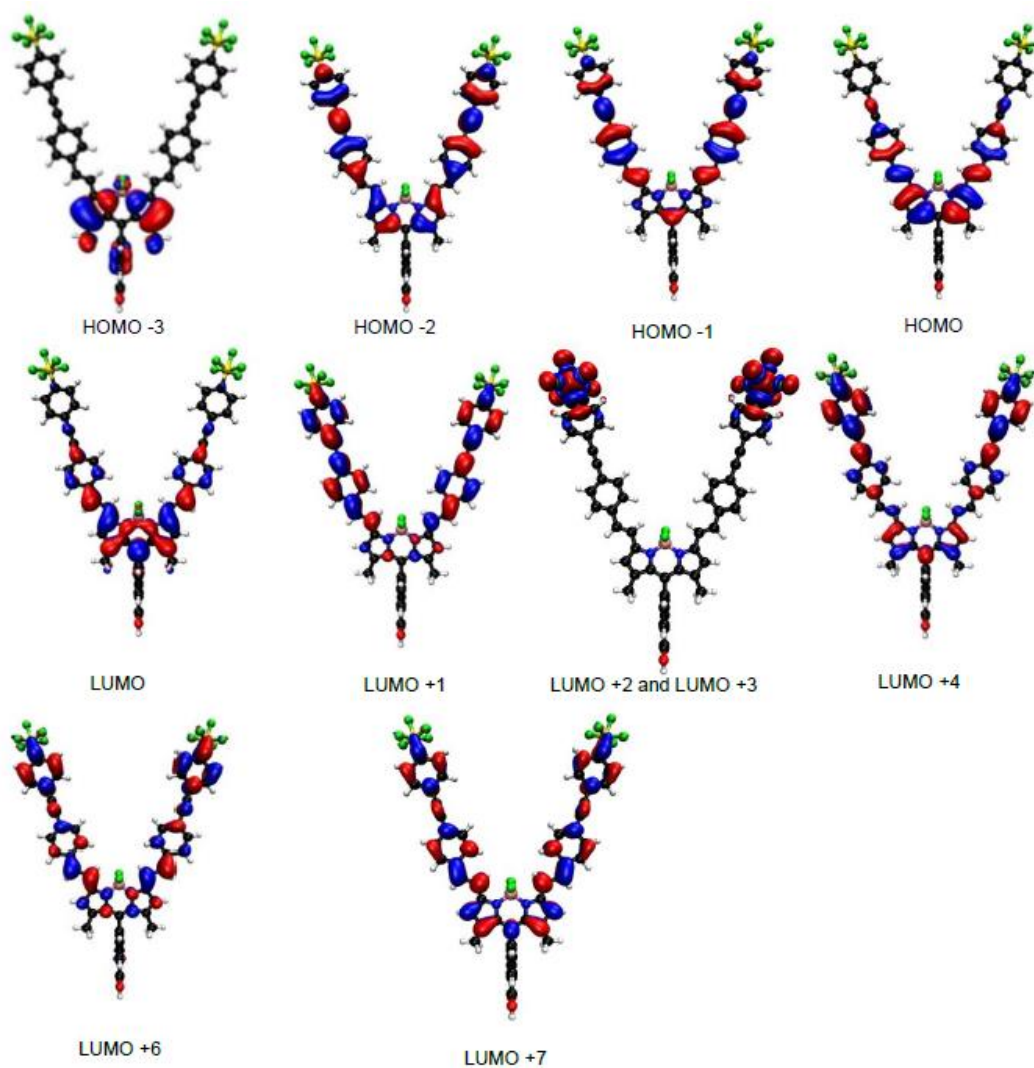

**Figure S4.** DFT calculated Kohn-Sham molecular orbitals using the B3LYP functional and the 6-311G(d,p) basis set for **BD6**.

**Table S4.** TD-DFT calculated parameters for the carboxylic acid version of **BD6** in vacuo.

| Electronic Transition<br>(oscillator strength) | Energy /<br>eV (nm) | Orbitals      | % Contribution |
|------------------------------------------------|---------------------|---------------|----------------|
| 1 (1.2547)                                     | 2.07 (599)          | HOMO→LUMO     | 97             |
|                                                |                     | HOMO-1→LUMO+1 | 3              |
| 2 (3.8114)                                     | 3.31 (375)          | HOMO-1→LUMO   | 47             |
|                                                |                     | HOMO→LUMO+1   | 40             |
|                                                |                     | HOMO-2→LUMO+1 | 5              |
|                                                |                     | HOMO-1→LUMO+4 | 4              |
|                                                |                     | HOMO→LUMO+6   | 4              |
|                                                |                     | 3 (0.0999)    | 3.64 (341)     |
|                                                |                     | HOMO→LUMO+4   | 26             |
|                                                |                     | HOMO-2→LUMO   | 16             |
|                                                |                     | HOMO-1→LUMO+1 | 12             |
|                                                |                     | HOMO-1→LUMO+7 | 5              |

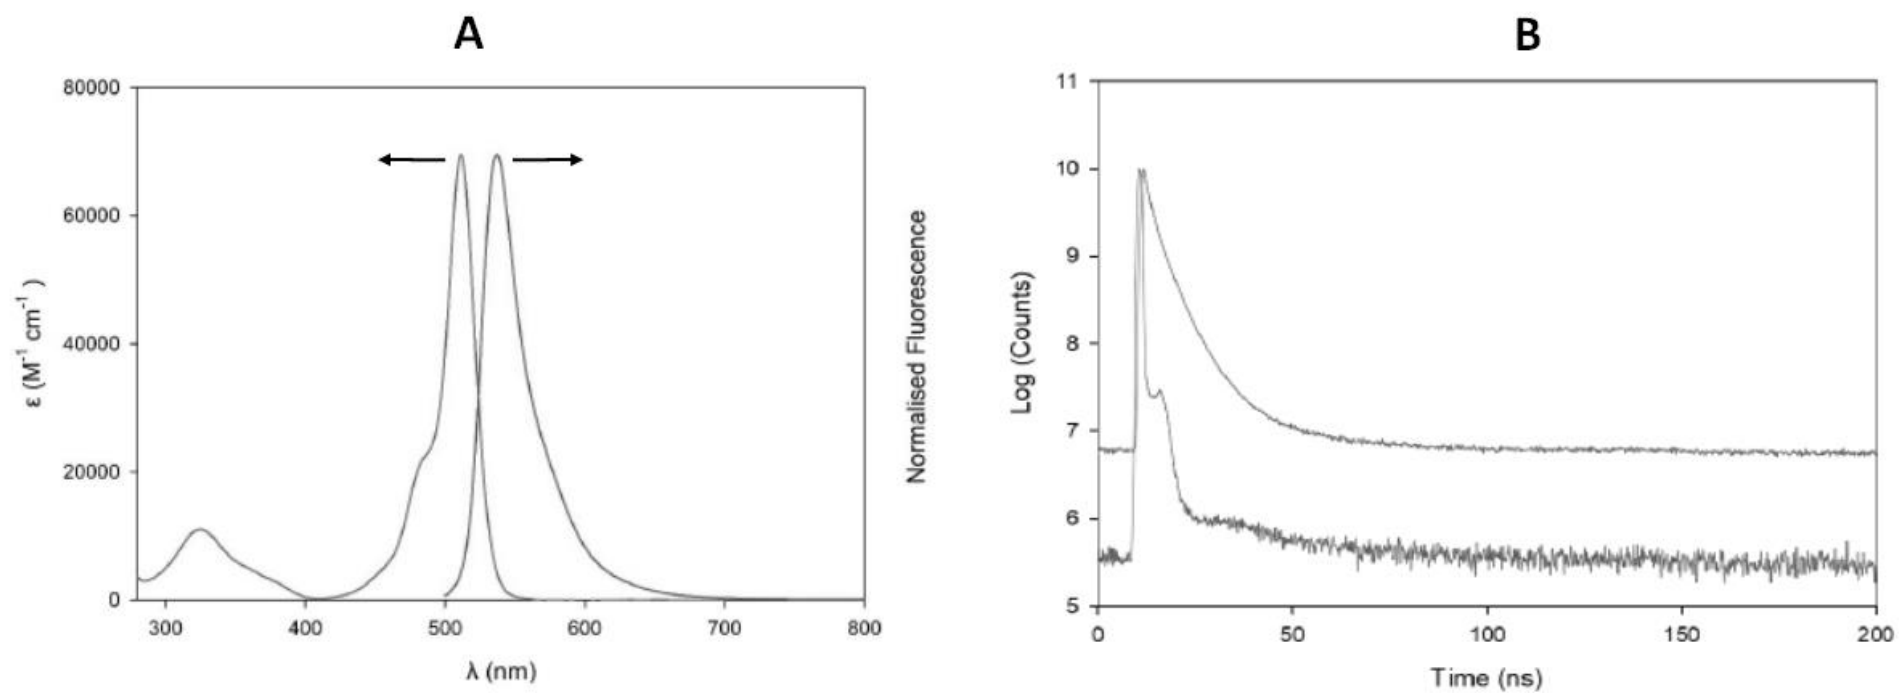

**Figure S5.** (A) Absorption and emission spectra recorded for **BD1** in  $\text{CH}_3\text{CN}$  at room temperature. (B) Fluorescence decay trace (top) and instrument response function (bottom) measured for **BD1** in  $\text{CH}_3\text{CN}$  using single-photon-counting.



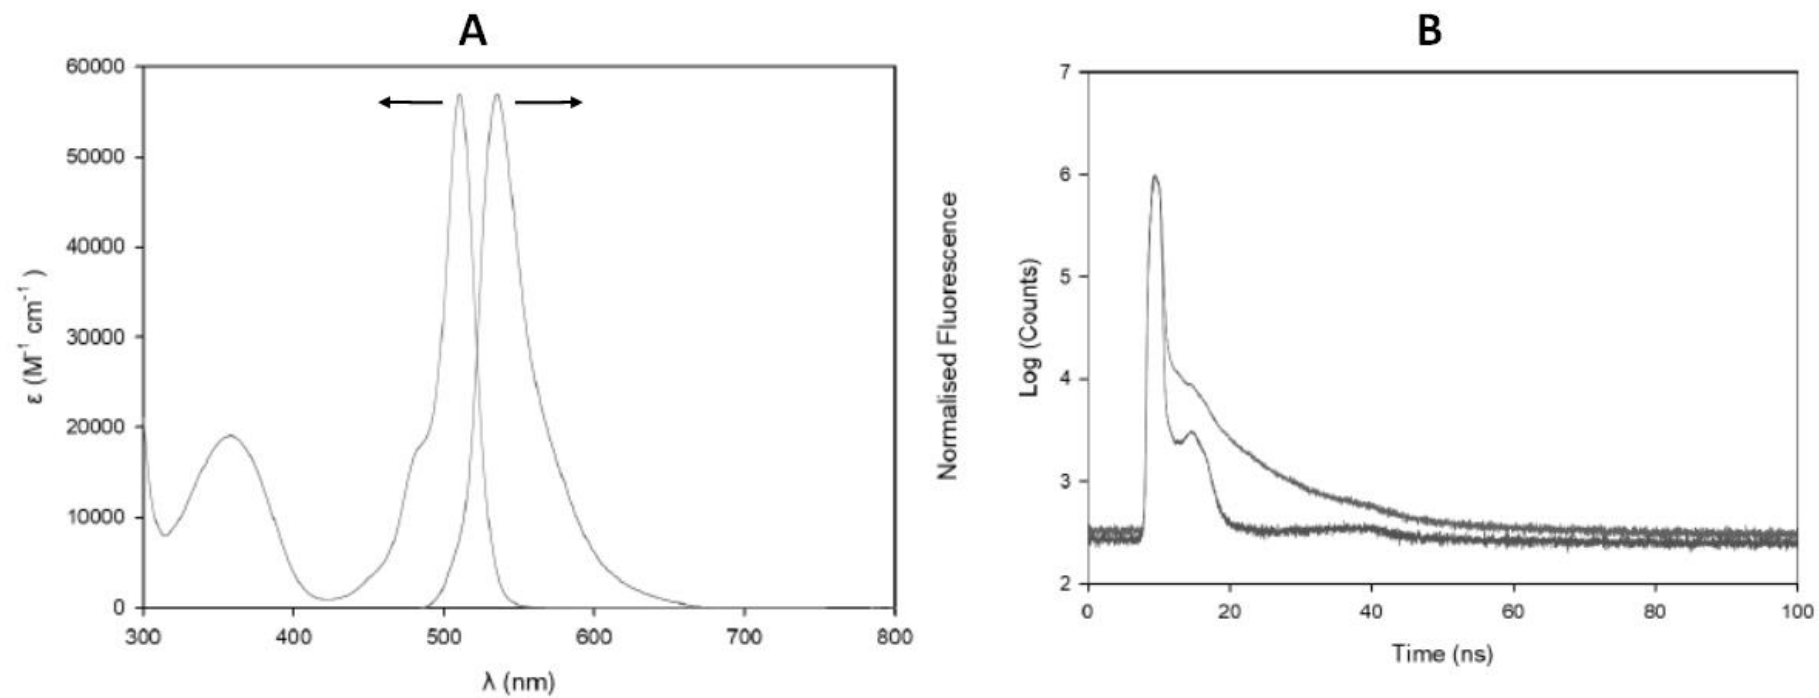

**Figure S6.** (A) Absorption and emission spectra recorded for **BD2** in  $CH_3CN$  at room temperature. (B) Fluorescence decay trace (top) and instrument response function (bottom) measured for **BD2** in  $CH_3CN$  using single-photon-counting.



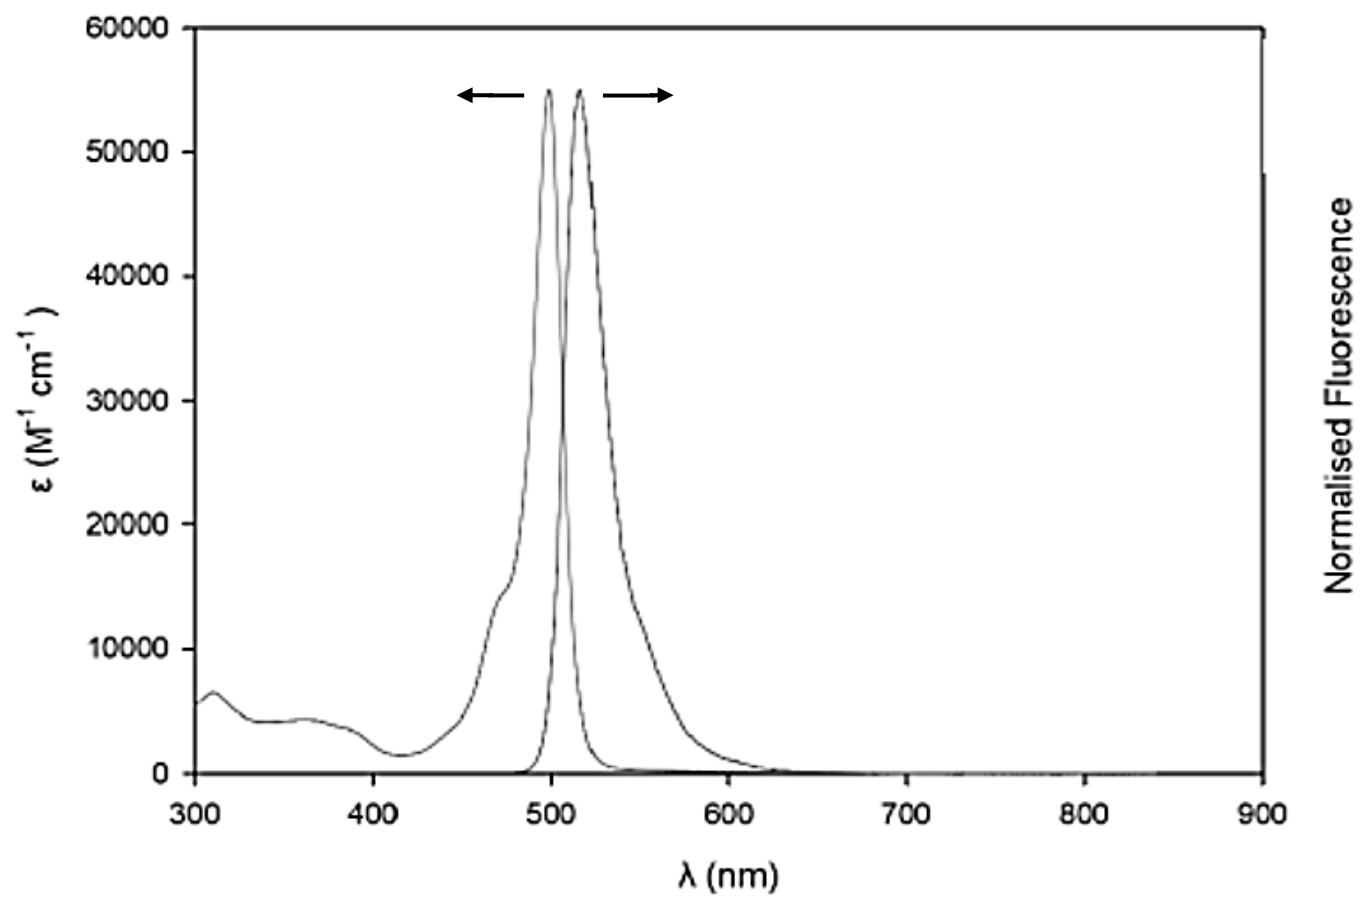

**Figure S7.** Absorption and emission spectra recorded for **BD3** in CH<sub>3</sub>CN at room temperature.

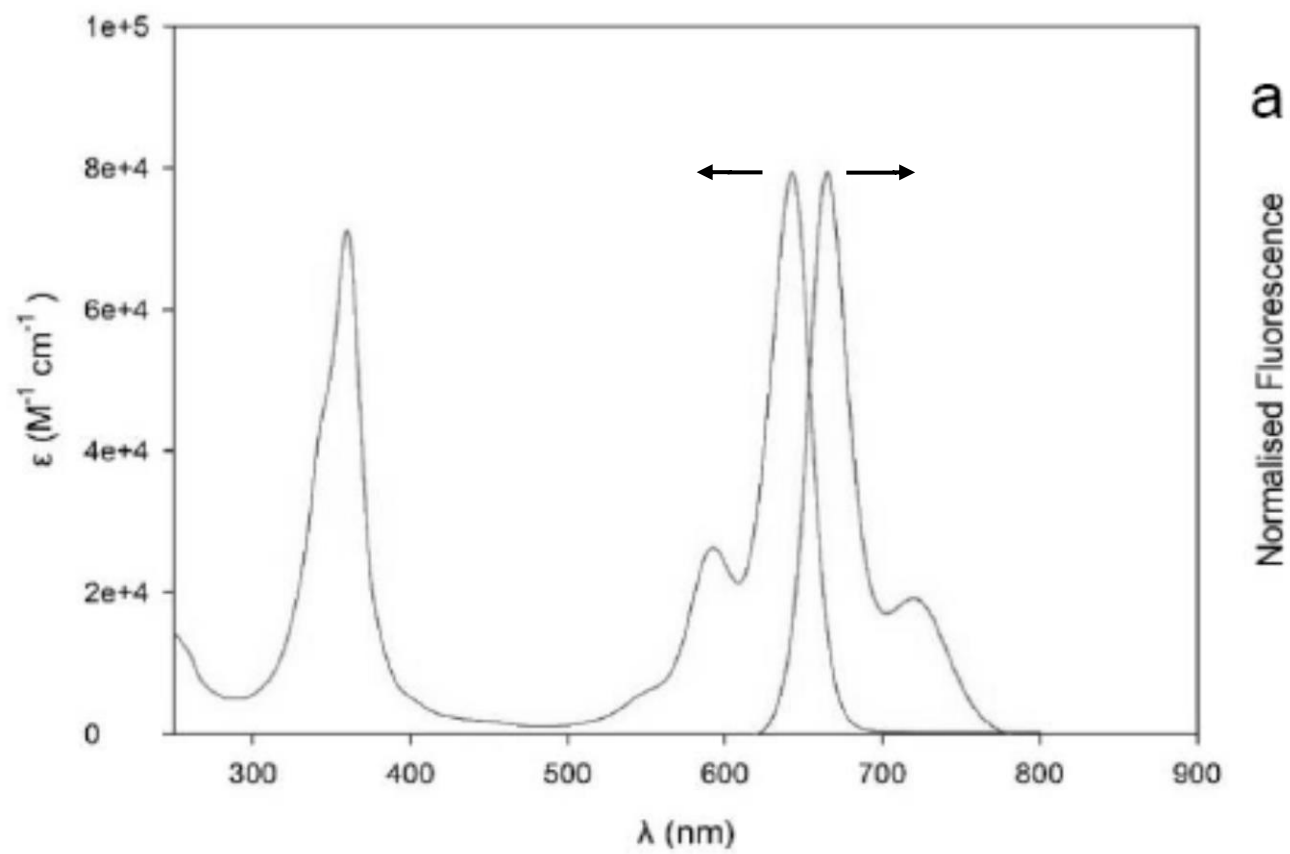

**Figure S8.** Absorption and emission spectra recorded for **BD4** in CH<sub>3</sub>CN at room temperature.

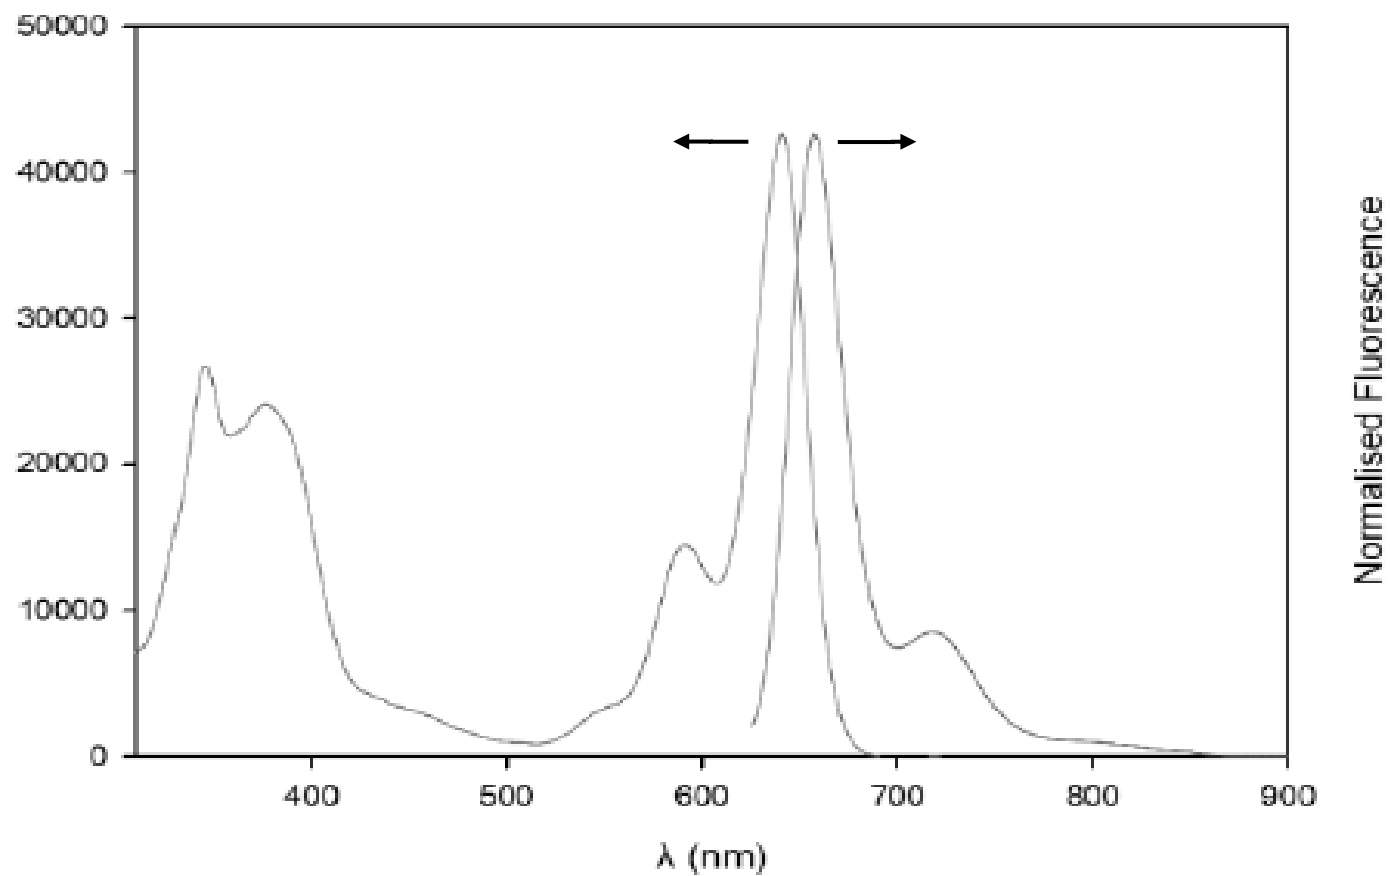

**Figure S9.** Absorption and emission spectra recorded for **BD5** in CH<sub>3</sub>CN at room temperature.

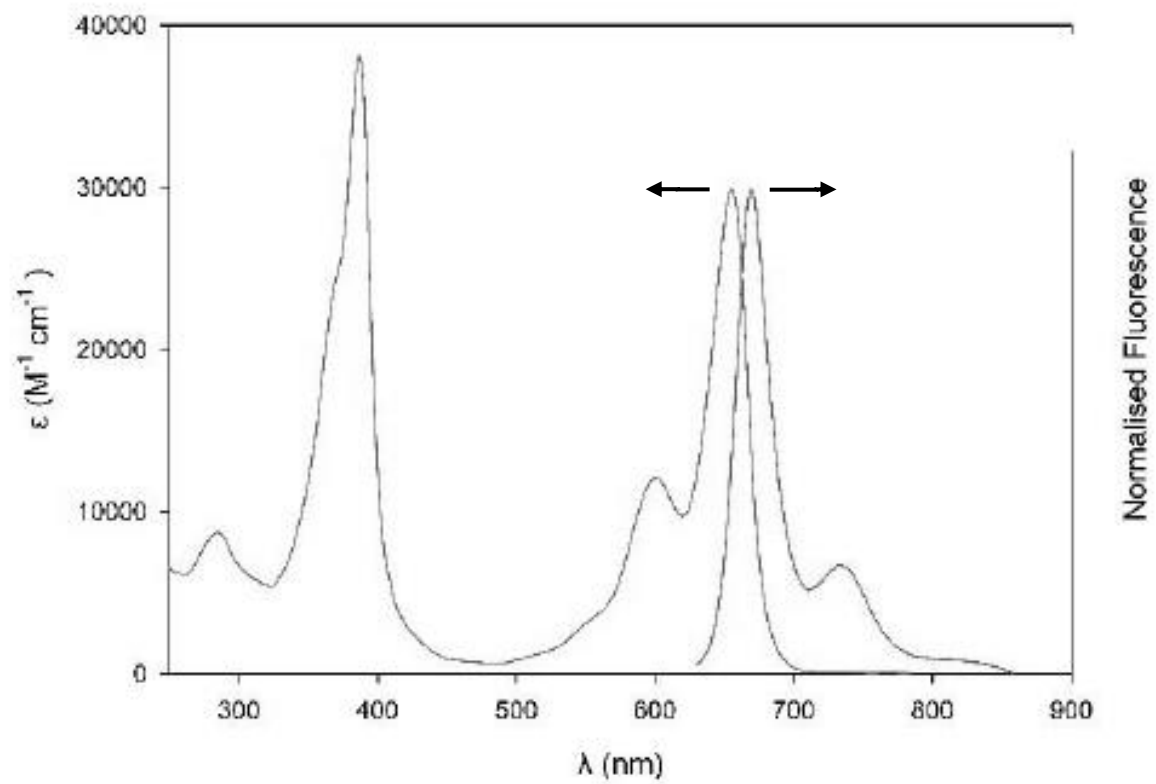

**Figure S10.** Absorption and emission spectra recorded for **BD6** in CH<sub>3</sub>CN at room temperature.

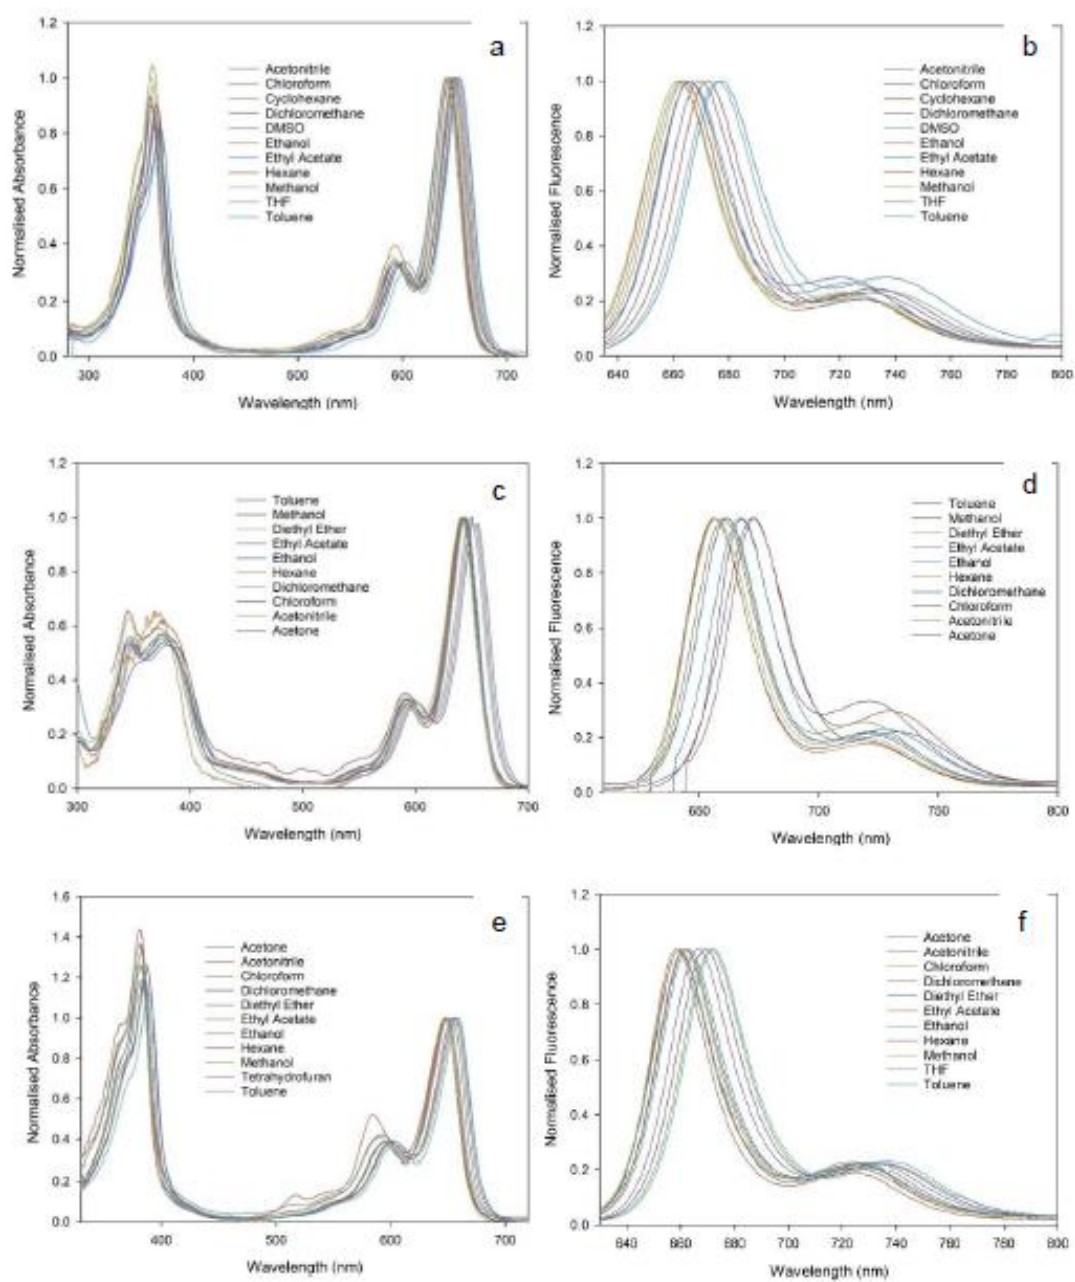

**Figure S11.** Absorption and emission spectra recorded for **BD4** (a and b), **BD5** (c and d) and **BD6** (e and f) in a range of solvents at room temperature.

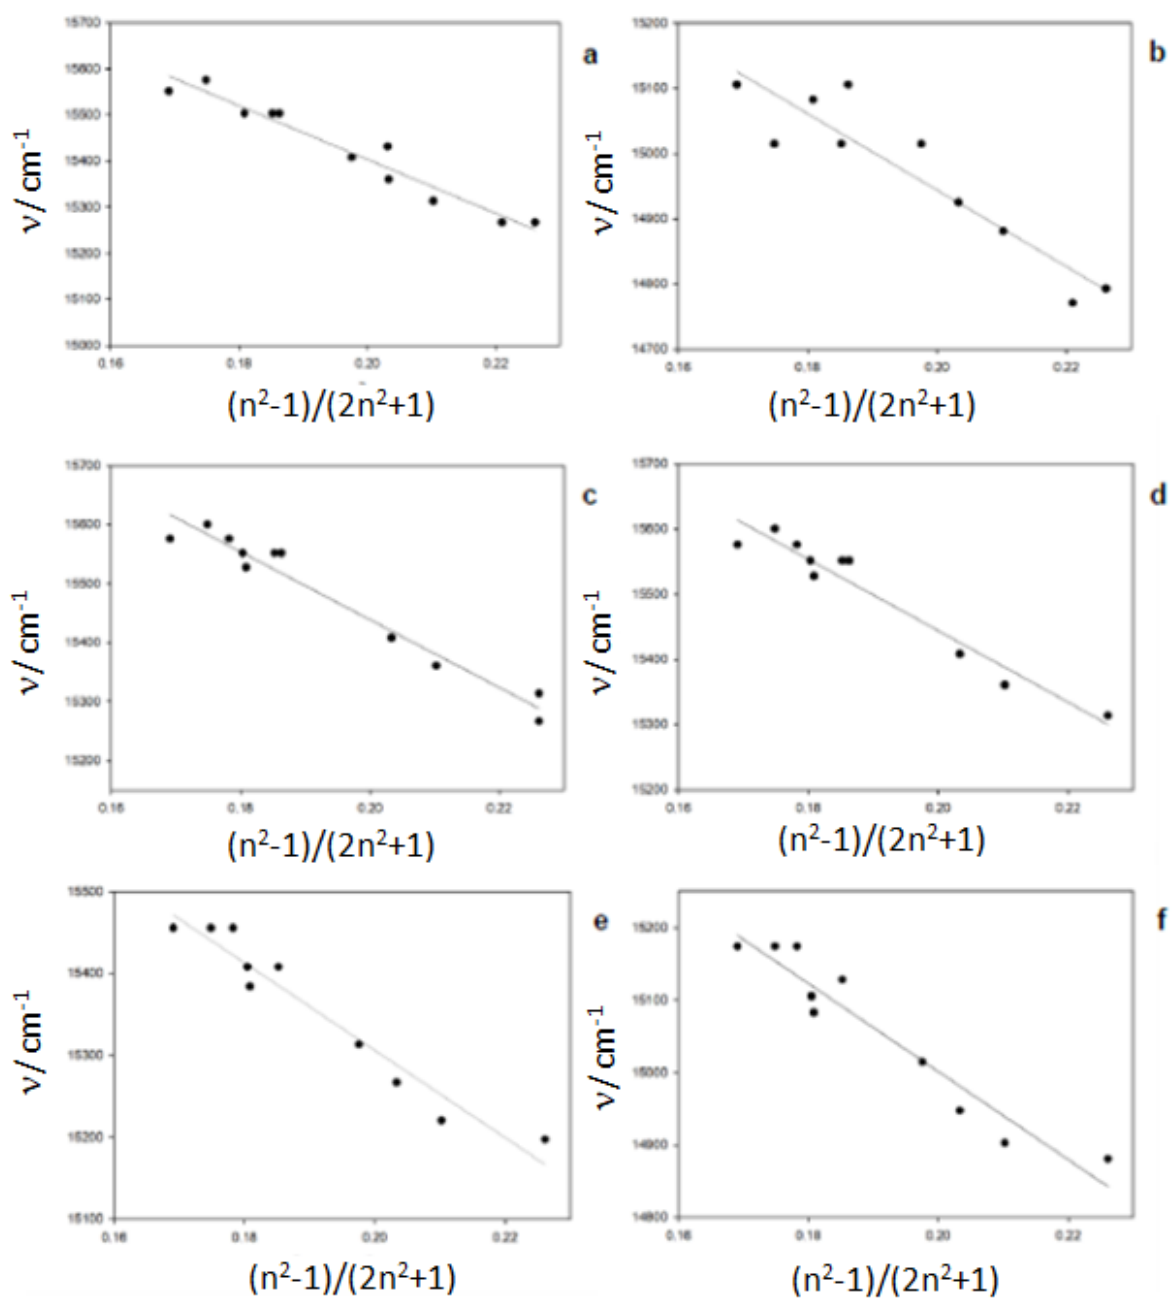

**Figure S12.** Plots of absorption maxima and emission maxima versus the solvent polarizability function for **BD4** (a and b), **BD5** (c and d) and **BD6** (e and f).

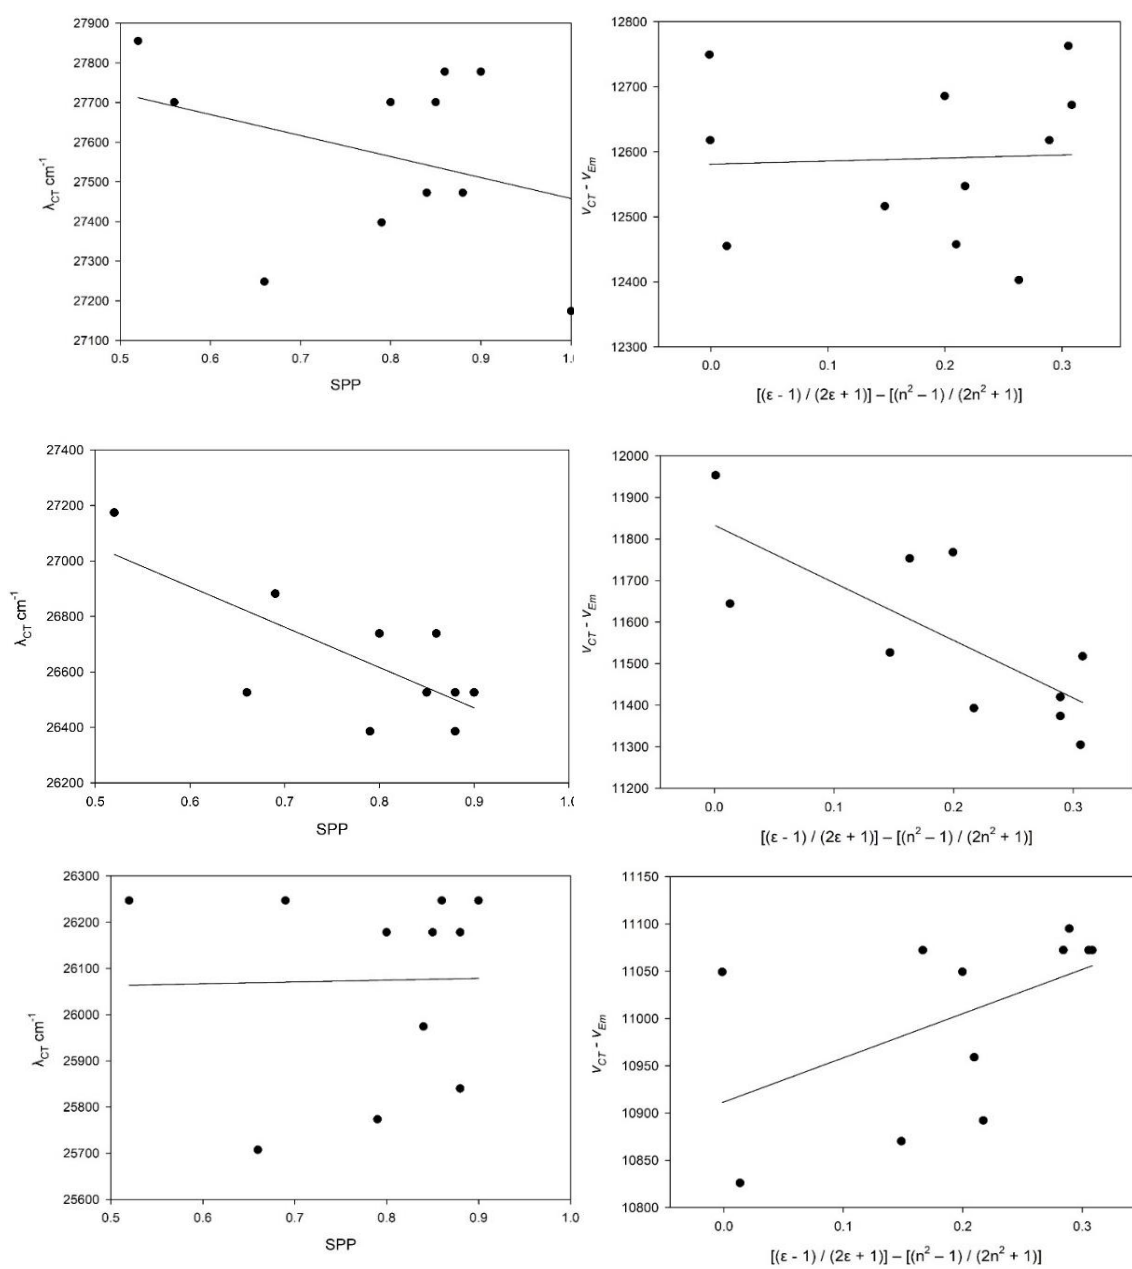

**Figure S13.** Catalán's Solvent Polarity (SPP) and Lippert Mataga plots for **BD4** (top), **BD5** (middle) and **BD6** (bottom).



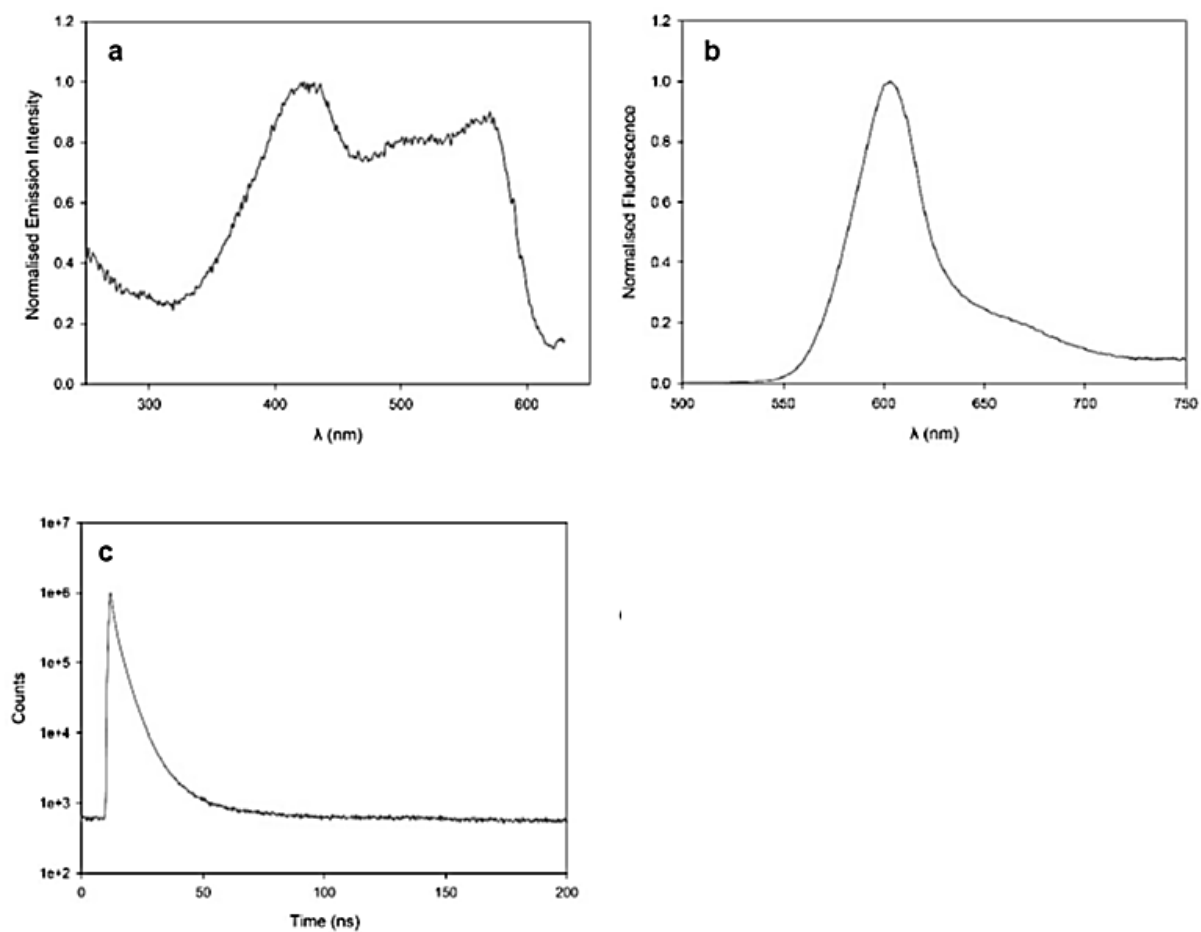

**Figure S14.** (a) Excitation spectrum measured at 650 nm, (b) fluorescence spectrum using 480 nm excitation and (c) fluorescence lifetime decay for a crystalline sample of **BD1**.

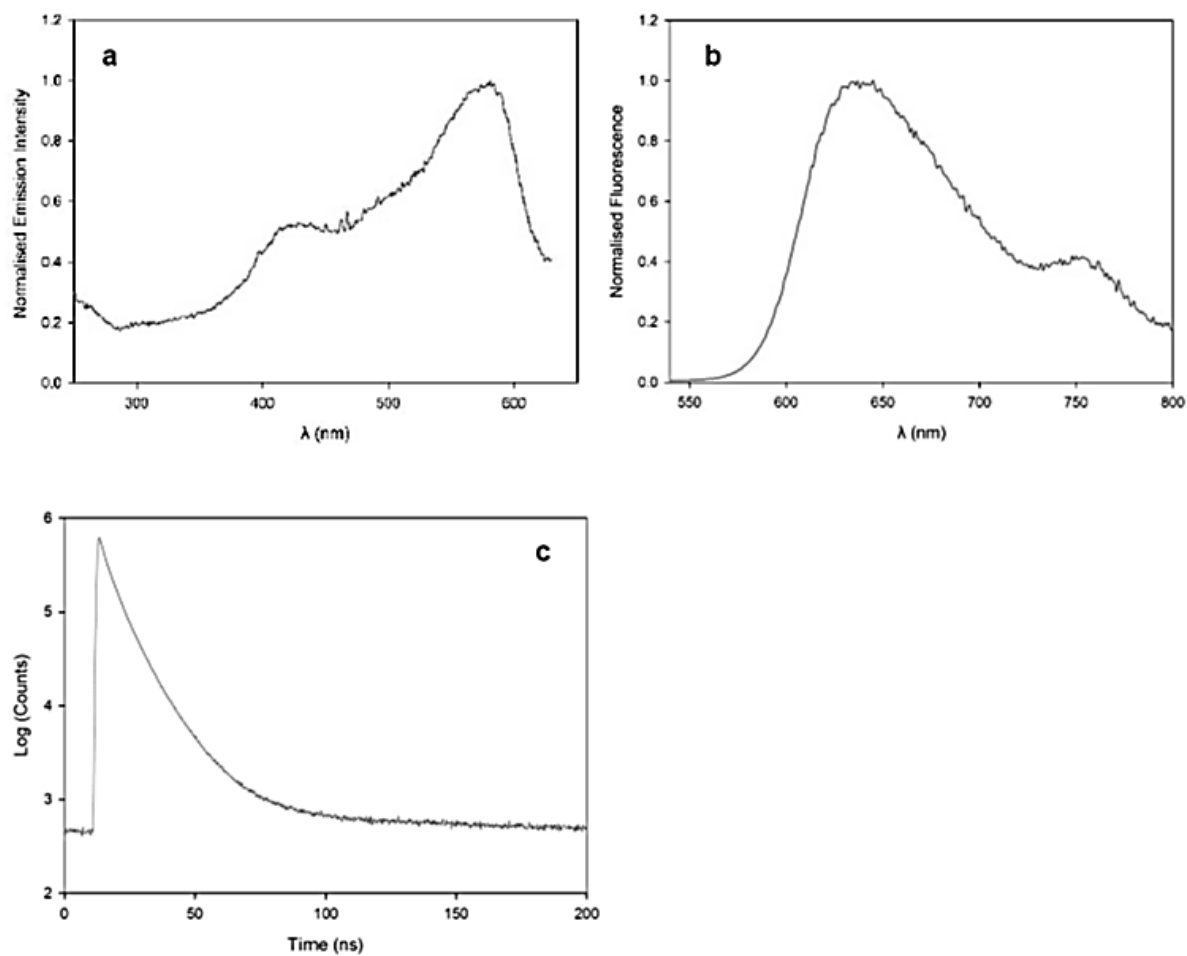

**Figure S15.** (a) Excitation spectrum measured at 630 nm, (b) fluorescence spectrum using 400 nm excitation and (c) fluorescence lifetime decay for a crystalline sample of **BD2**.

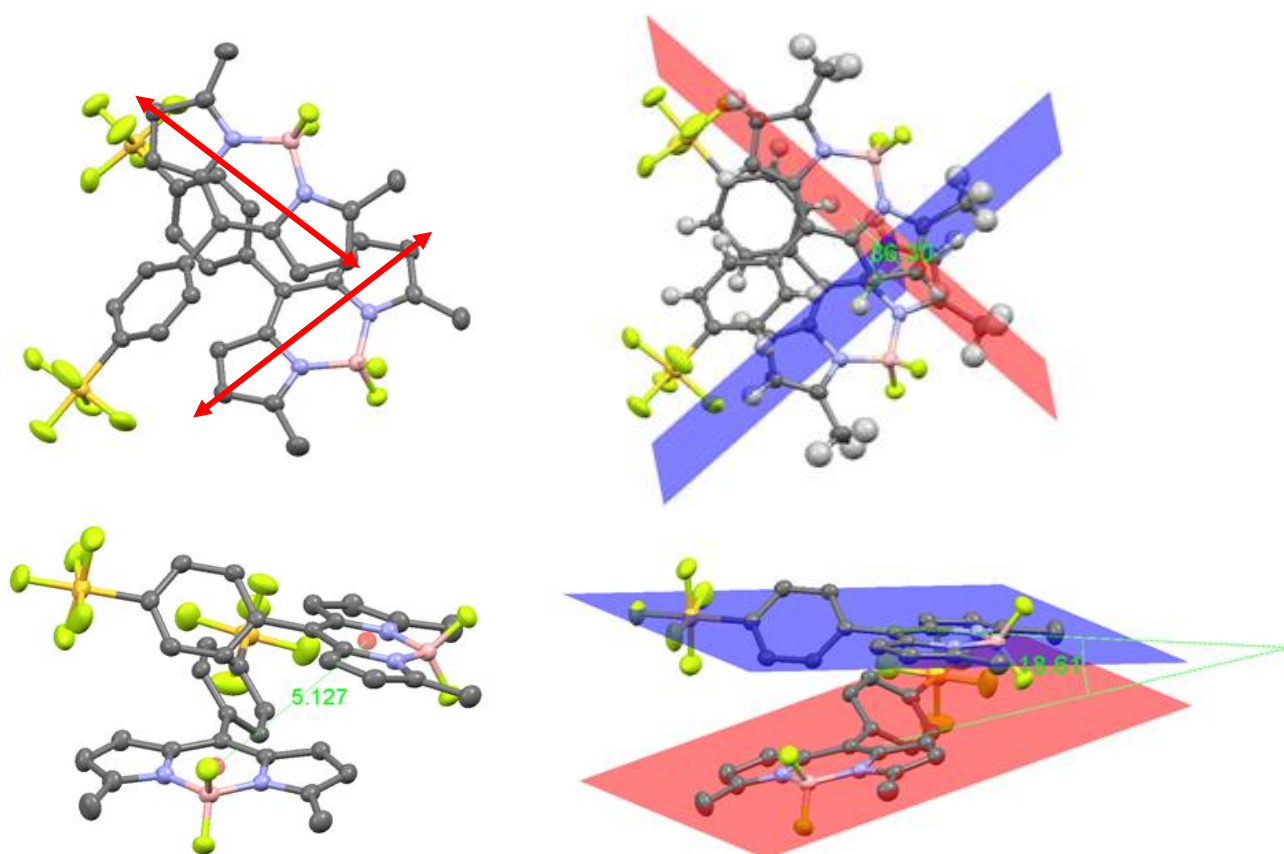

**Figure S16.** Representation of planes, angles and distances with regard to the electronic transition dipoles (red) for **BD1** as obtained from the crystal packing diagram.

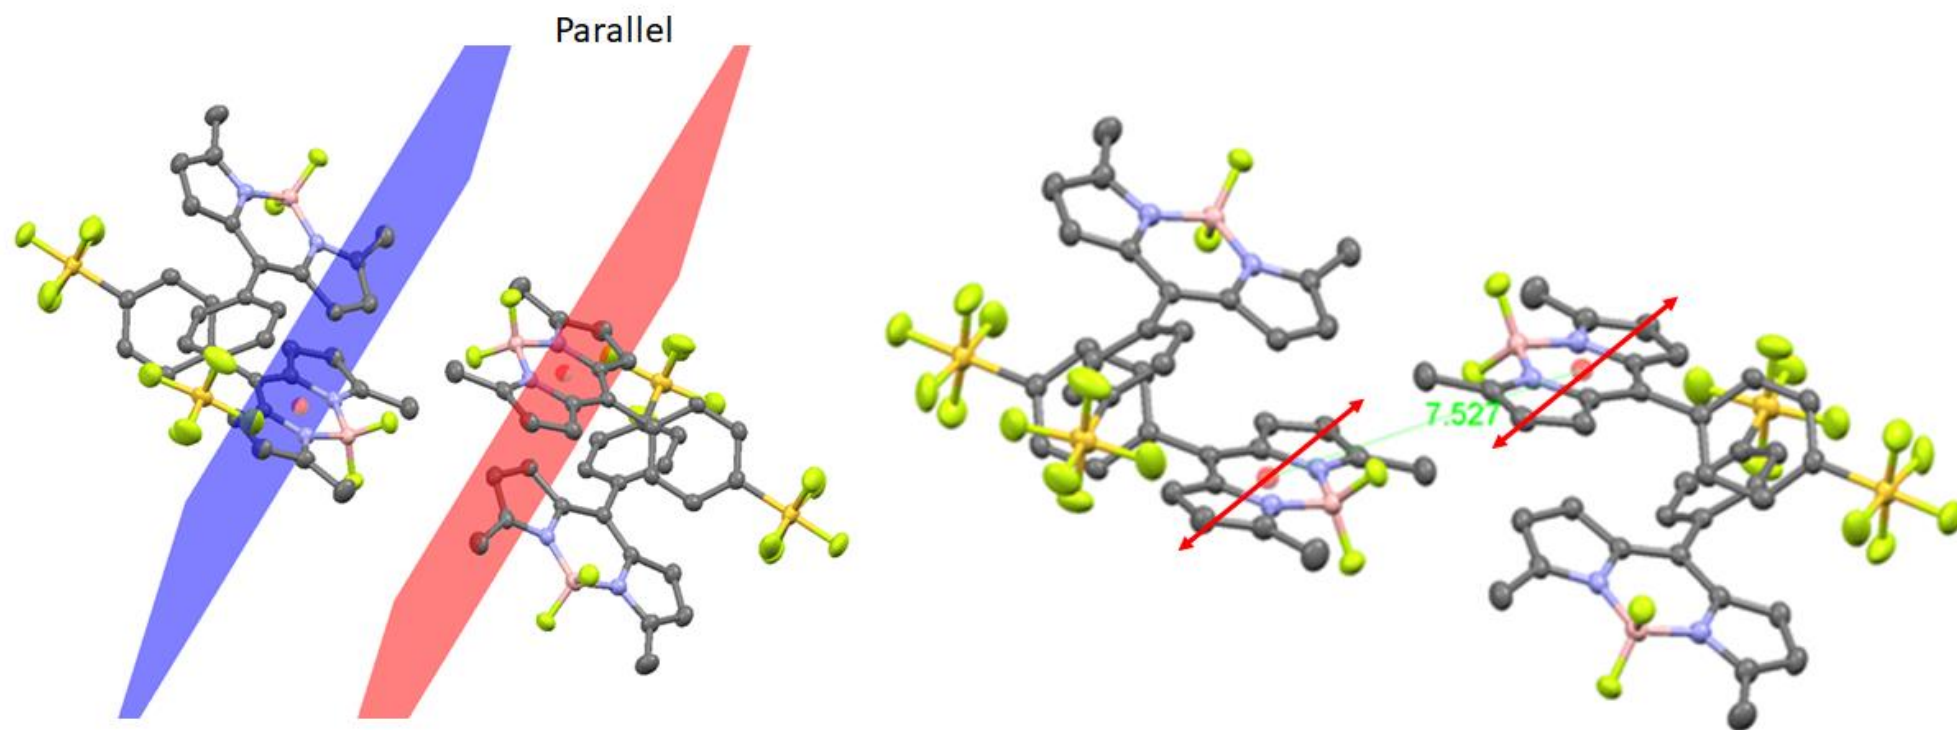

**Figure S17.** Representation of a dimer for **BD1** and separation distance as obtained from the crystal packing diagram.

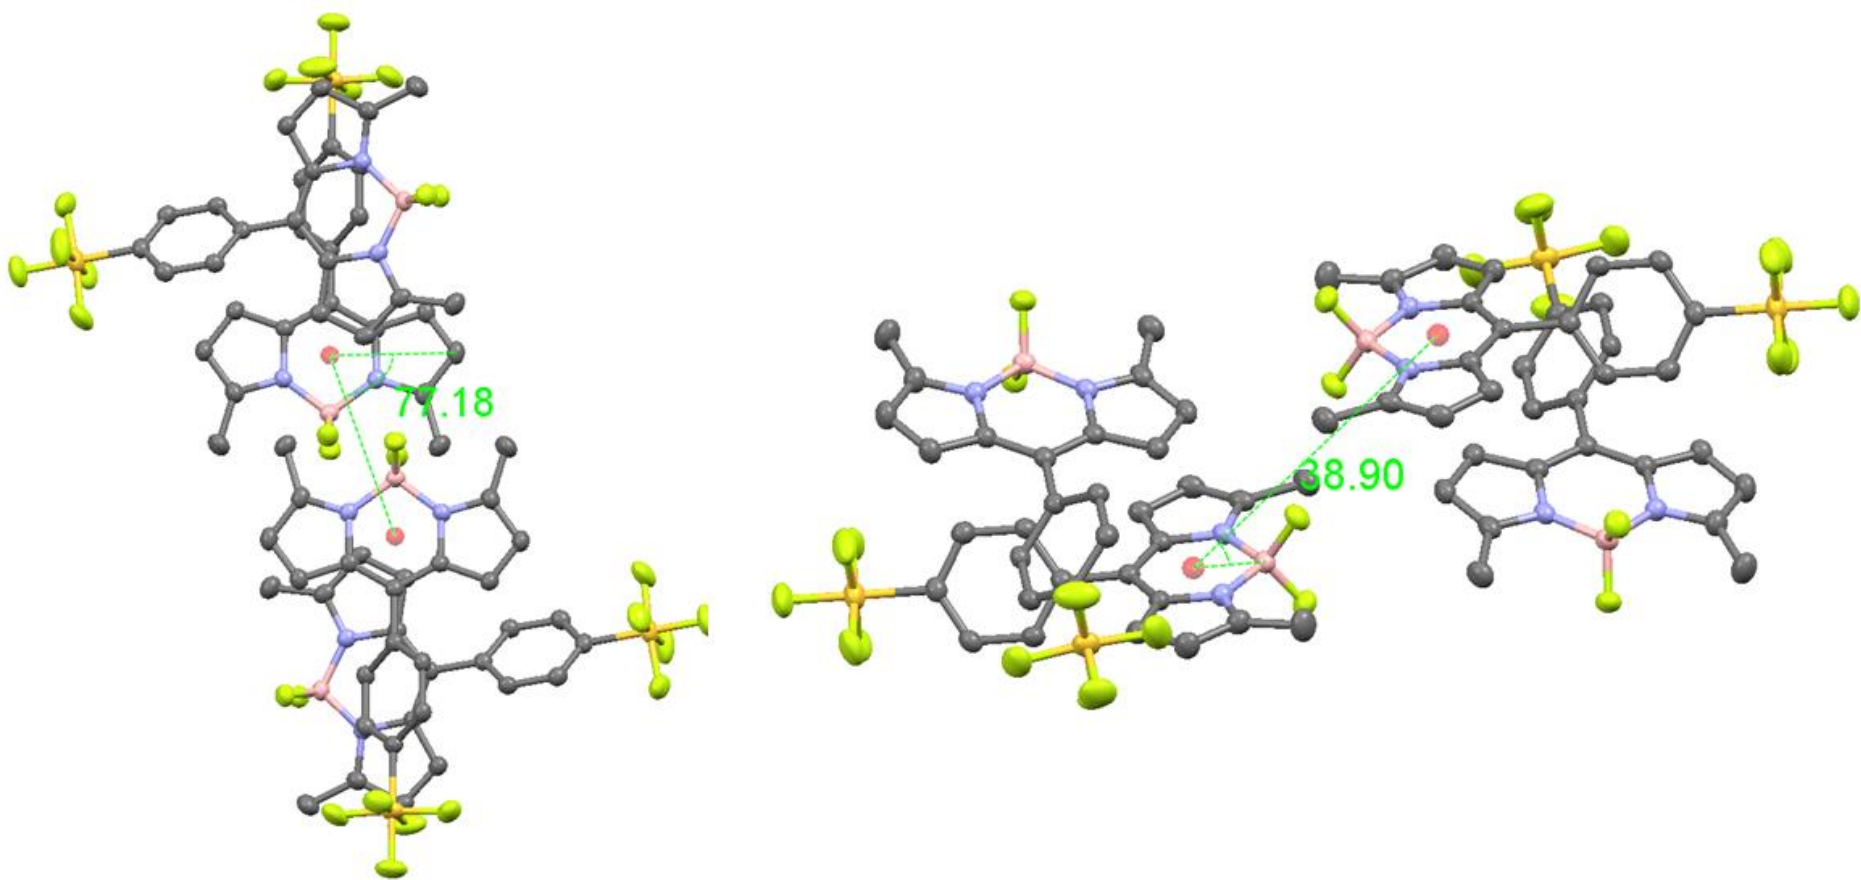

**Figure S18.** Representation of an offset face-to-face dimer for **BD1** and separation distance as obtained from the crystal packing diagram.

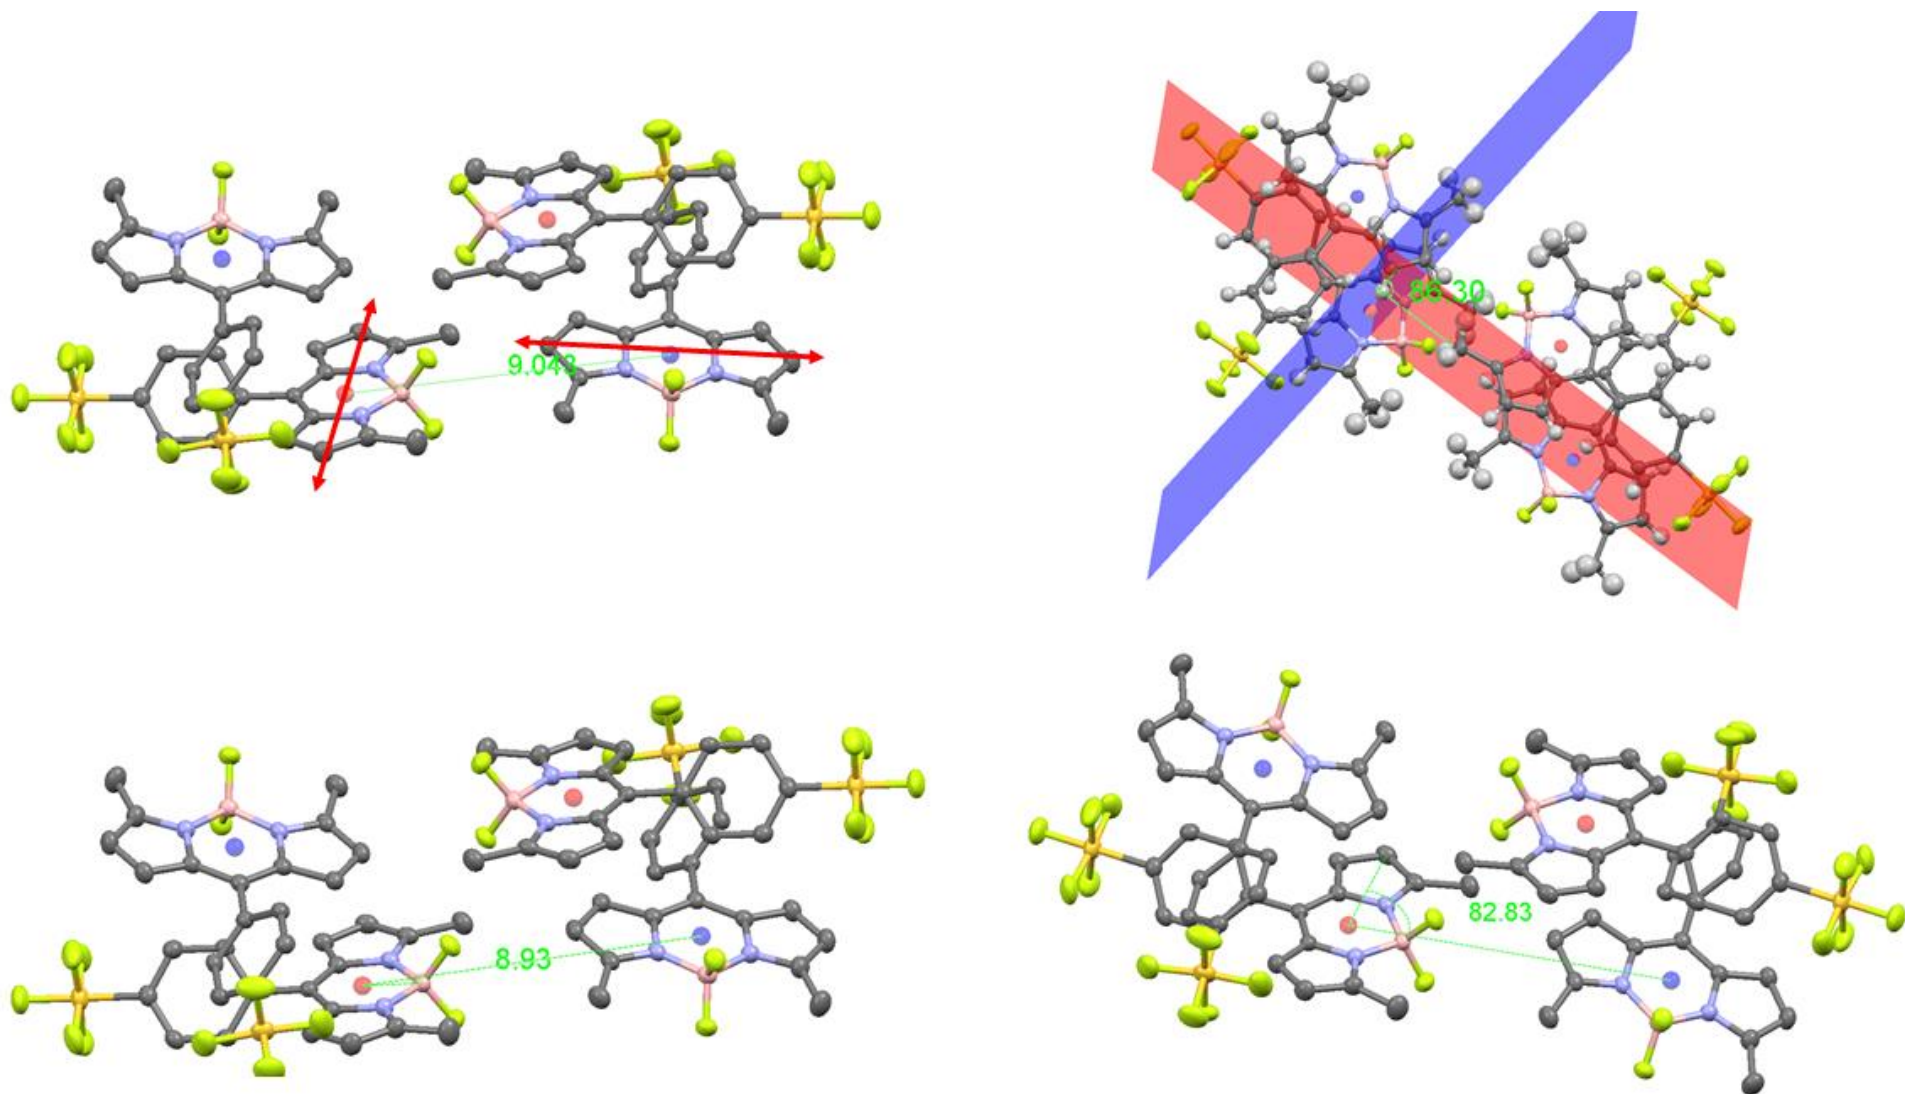

**Figure S19.** Representation of a dimer for **BD1** between separate stacks and the separation distance and angles as obtained from the crystal packing diagram.

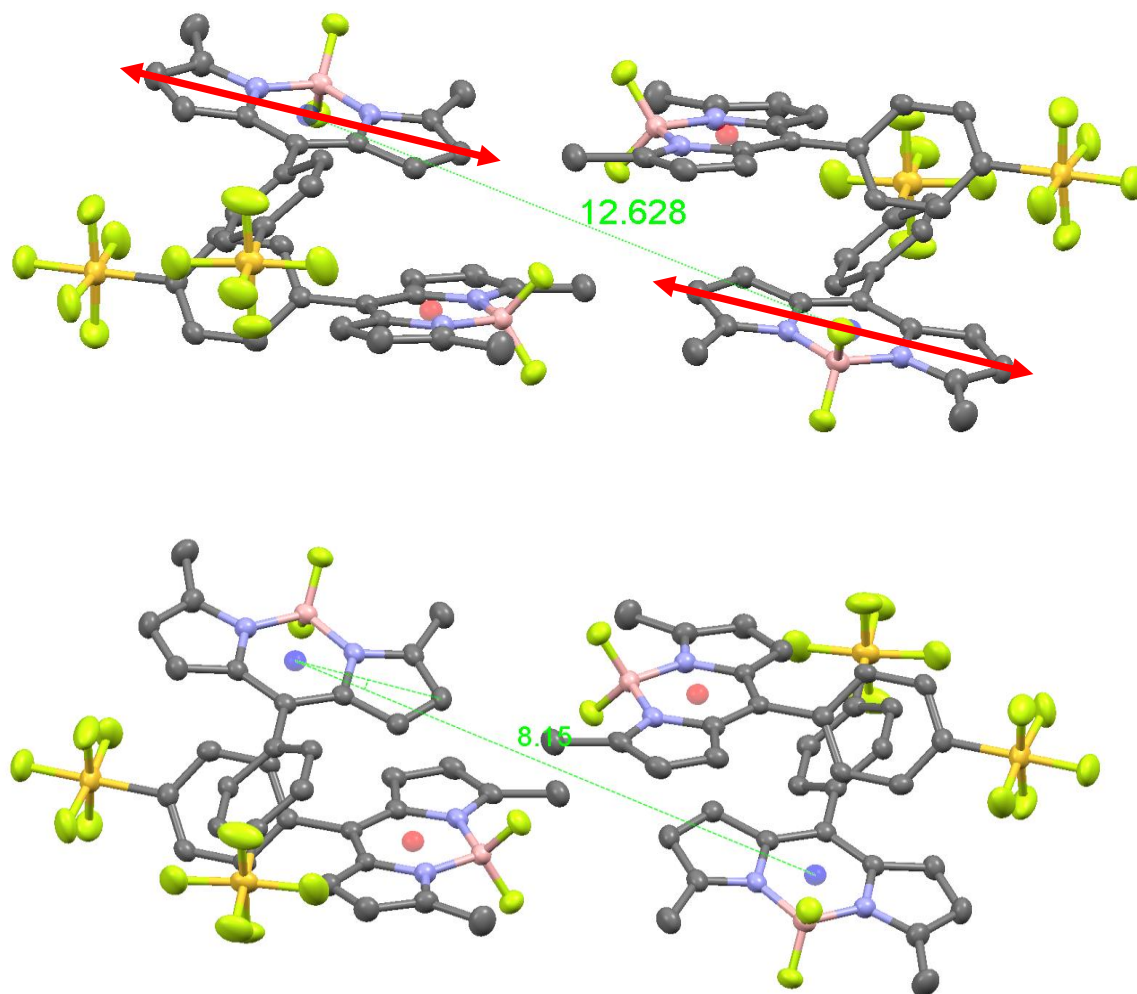

**Figure S20.** Representation of an offset co-linear dimer for **BD1** and separation distance and offset angle as obtained from the crystal packing diagram.



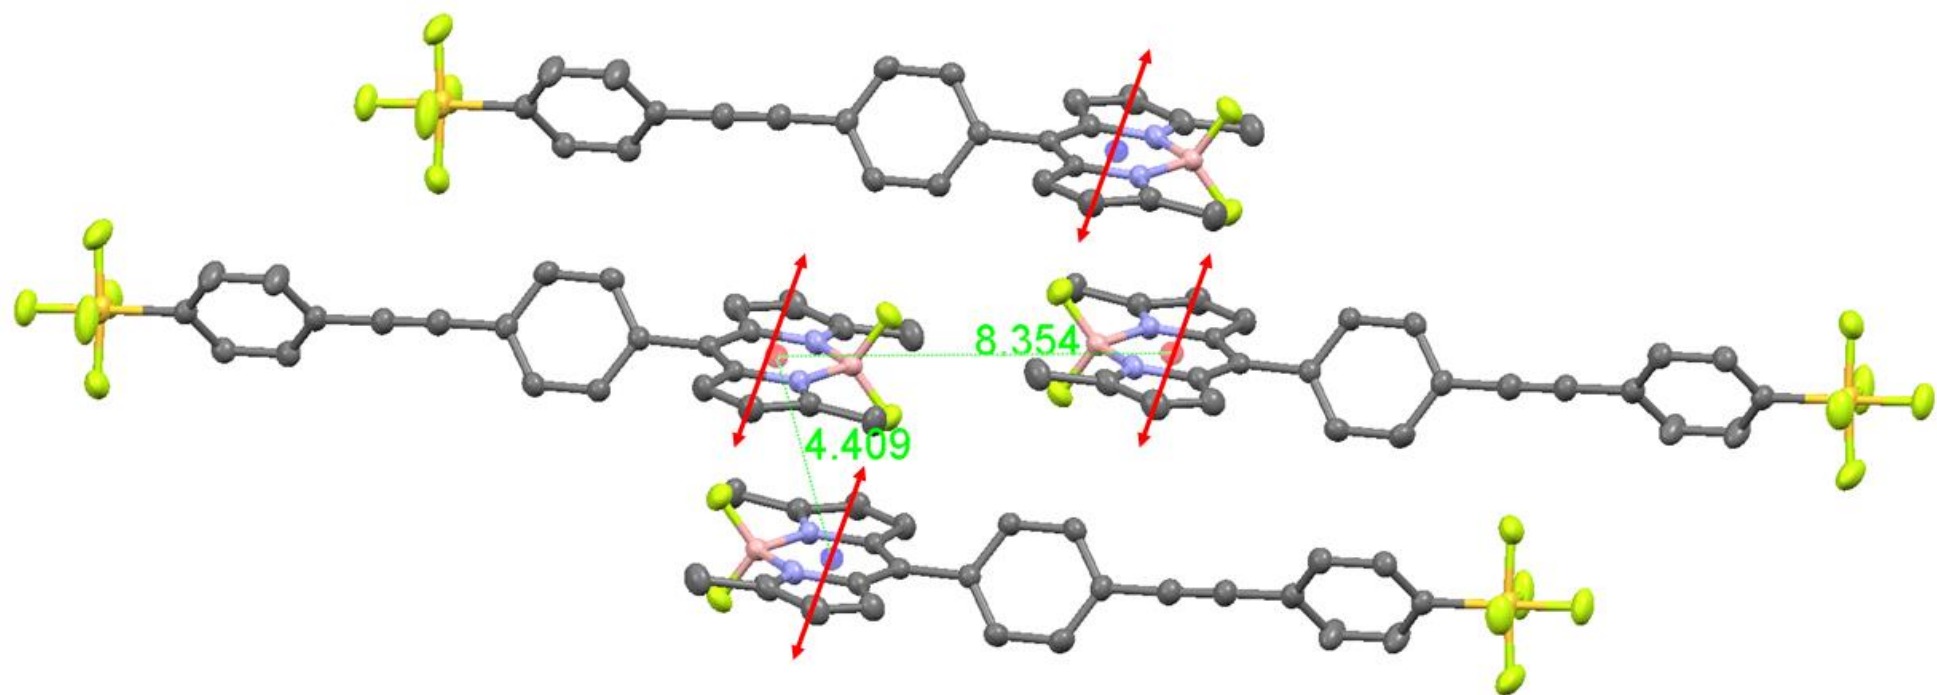

**Figure S21.** Representation of dimers for **BD2** and separation distance as obtained from the crystal packing diagram.

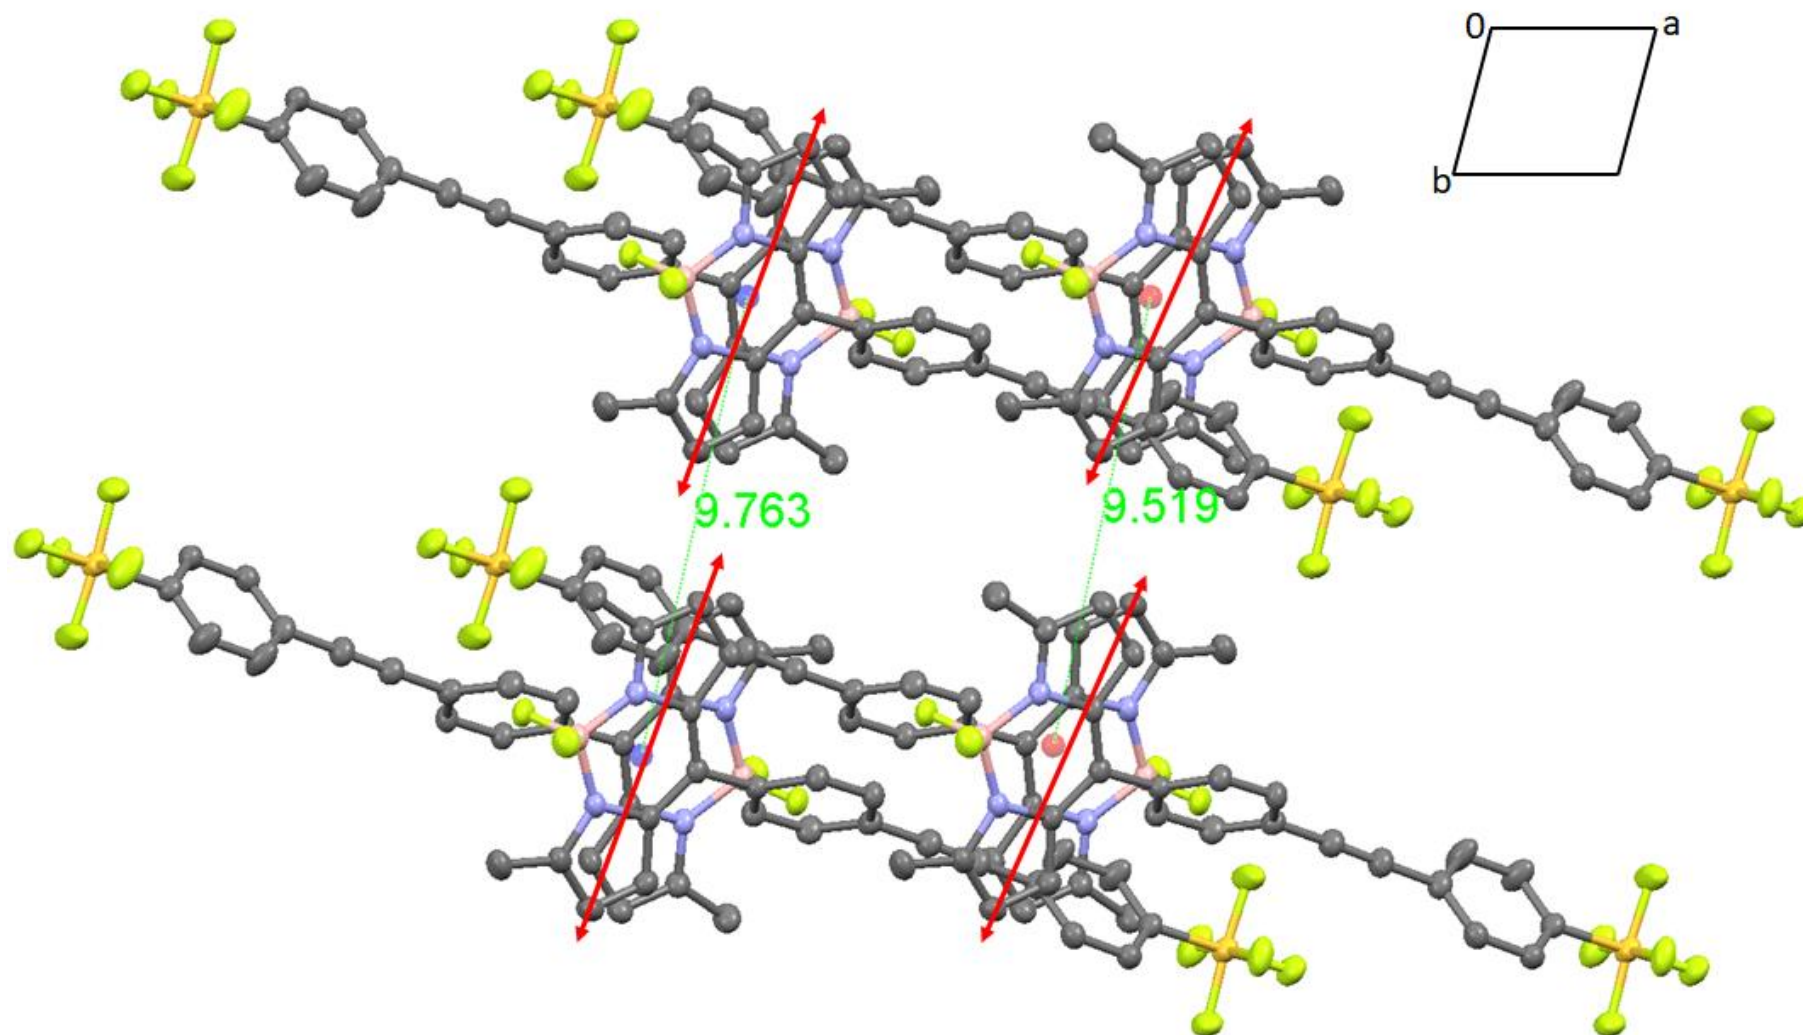

**Figure S22.** Representation of pseudo co-linear dimers for **BD2** and their separation distances as obtained from the crystal packing diagram. View is down the c-axis.

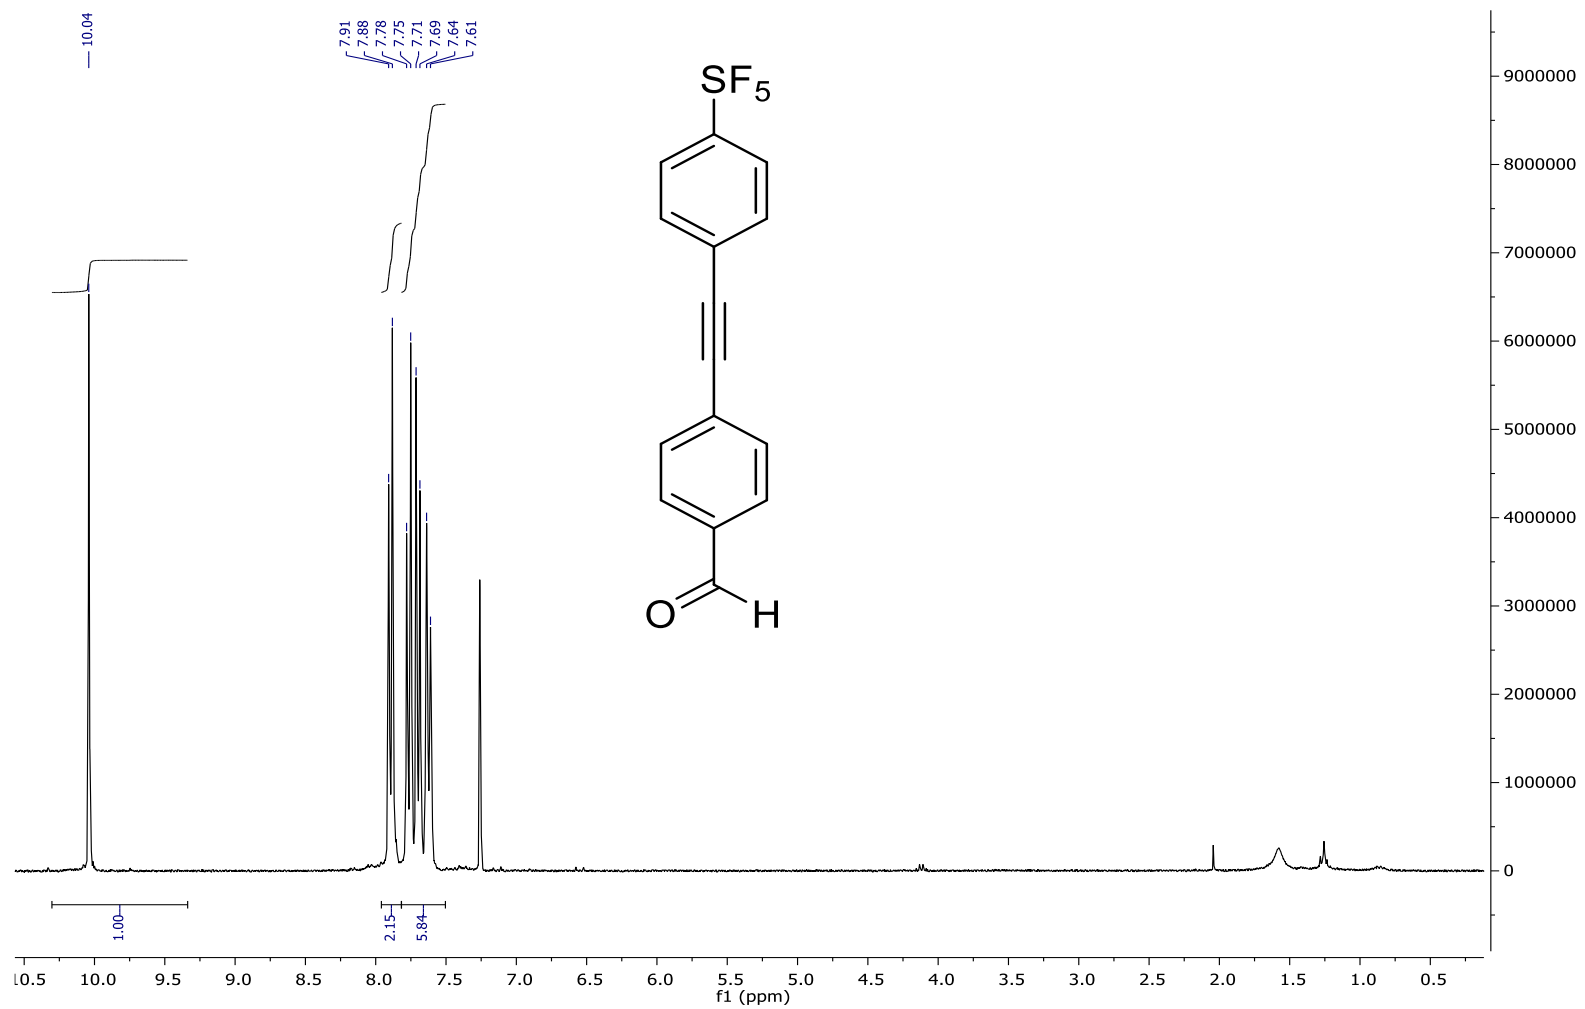

**Figure S23.** A 300 MHz  $^1\text{H}$  NMR spectrum of **2** recorded in  $\text{CDCl}_3$ .

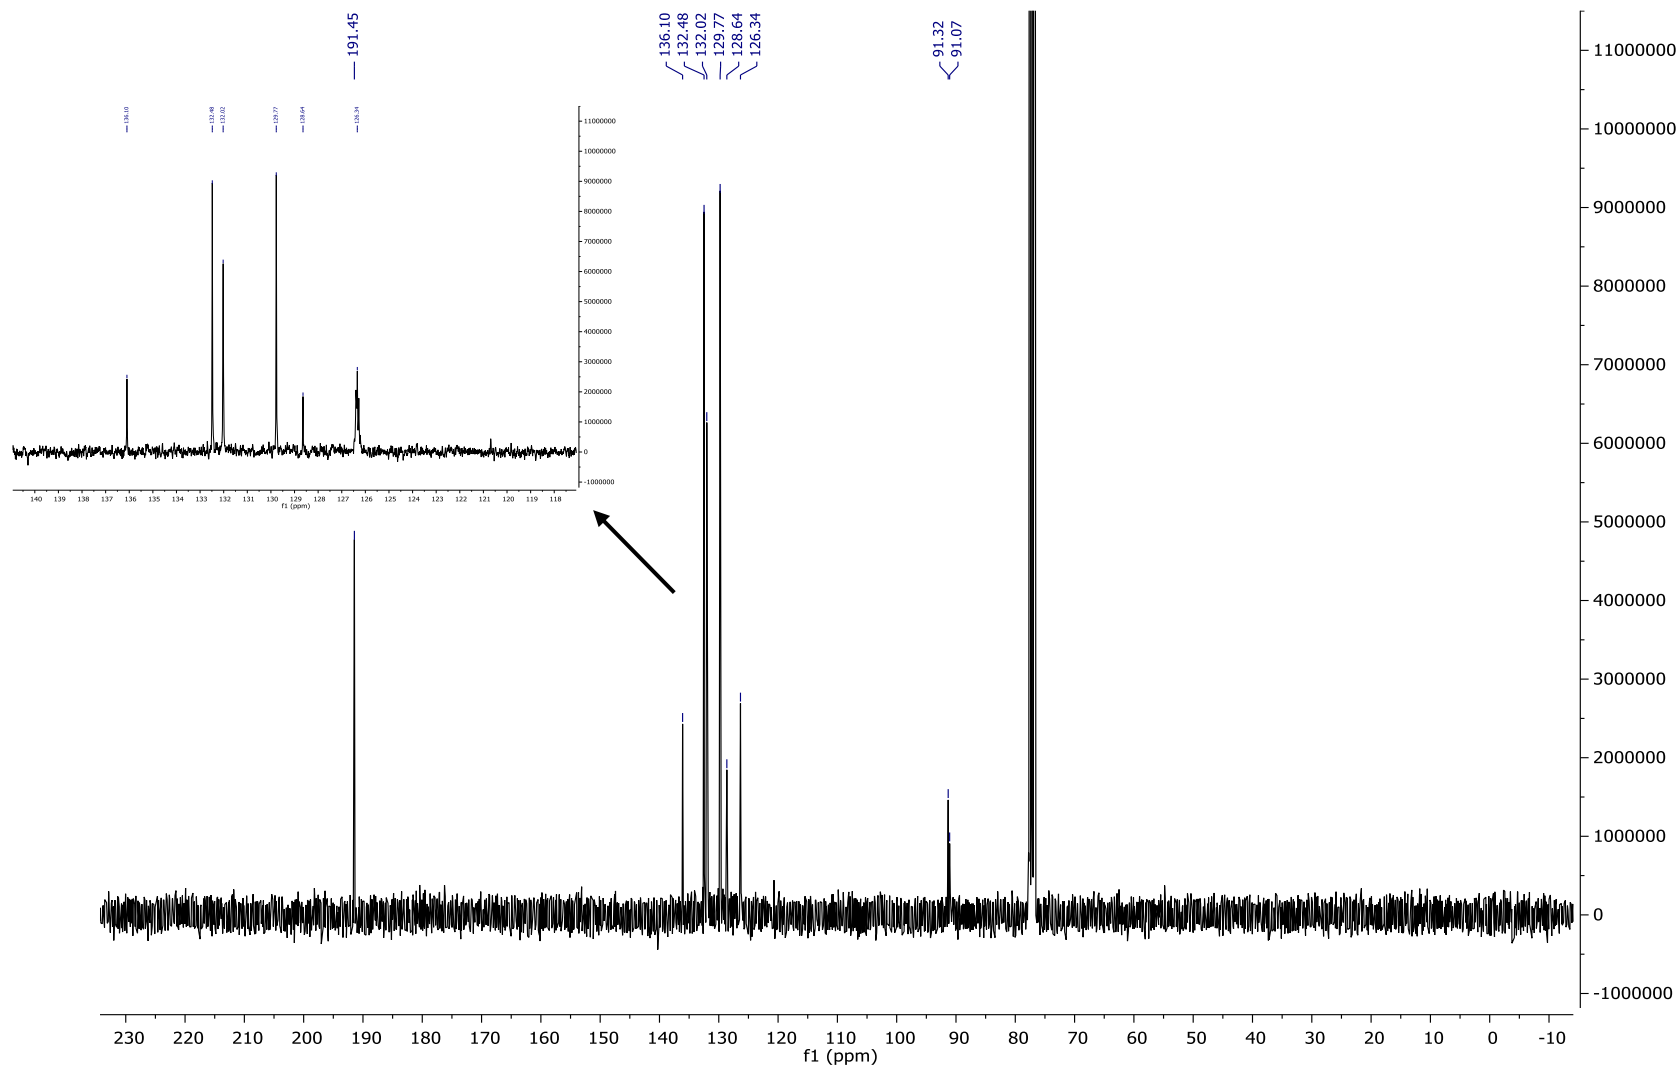

**Figure S24.** A 176 MHz  $^{13}\text{C}\{^1\text{H}\}$  NMR spectrum of **2** recorded in  $\text{CDCl}_3$ .

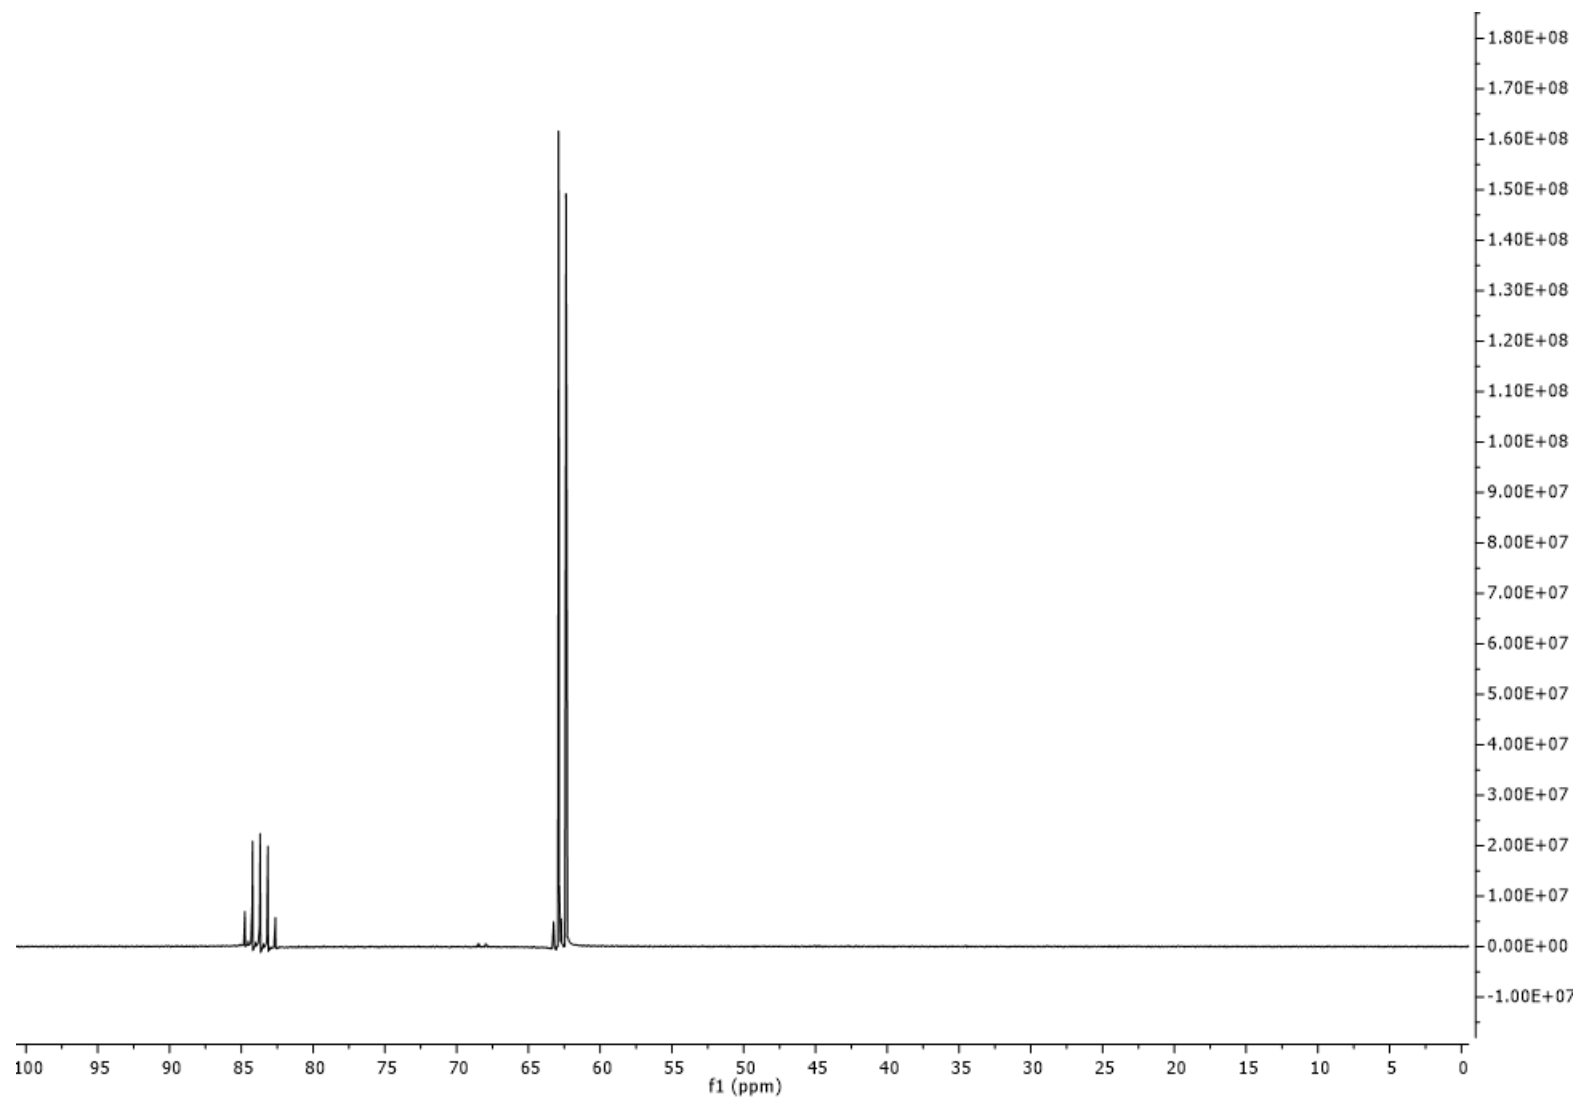

**Figure S25.** A 282 MHz  $^{19}\text{F}$  NMR spectrum of **2** recorded in  $\text{CDCl}_3$ .

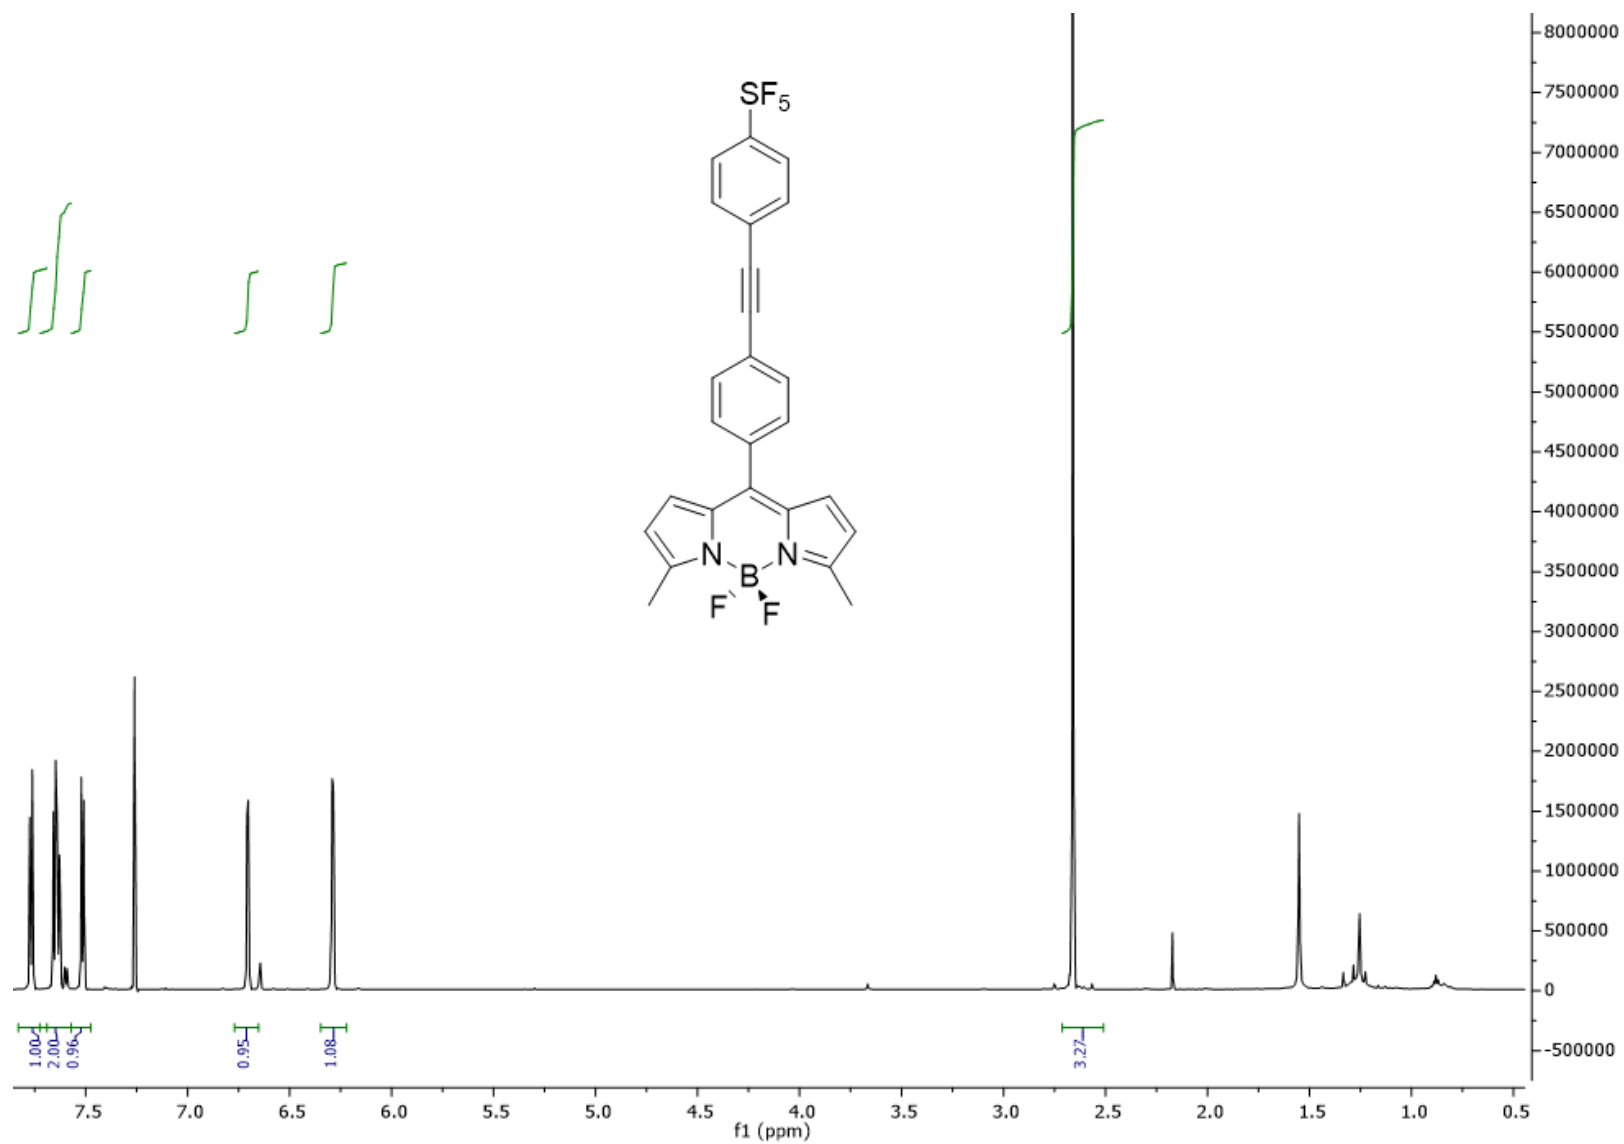

**Figure S26.** A 700 MHz <sup>1</sup>H NMR spectrum of **BD2** recorded in CDCl<sub>3</sub>.

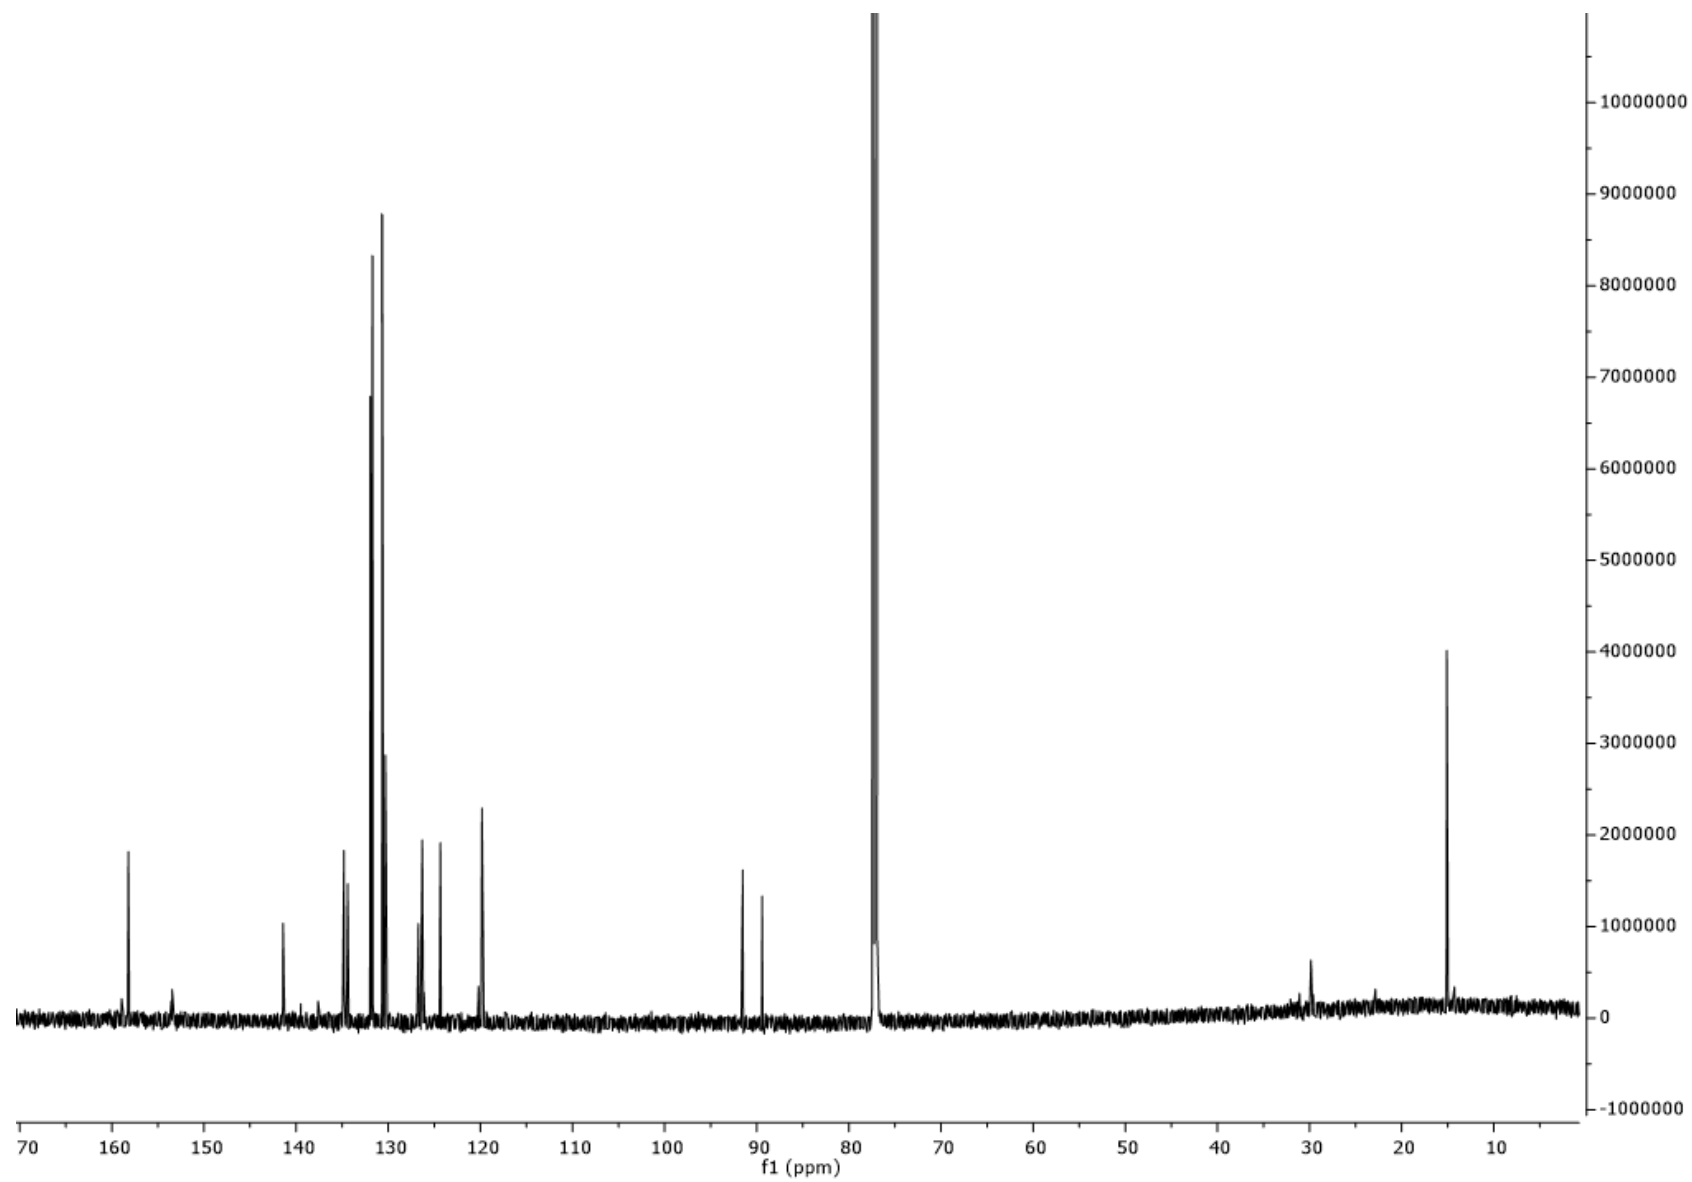

**Figure S27.** A 176 MHz  $^{13}\text{C}\{^1\text{H}\}$  NMR spectrum of **BD2** recorded in  $\text{CDCl}_3$ .



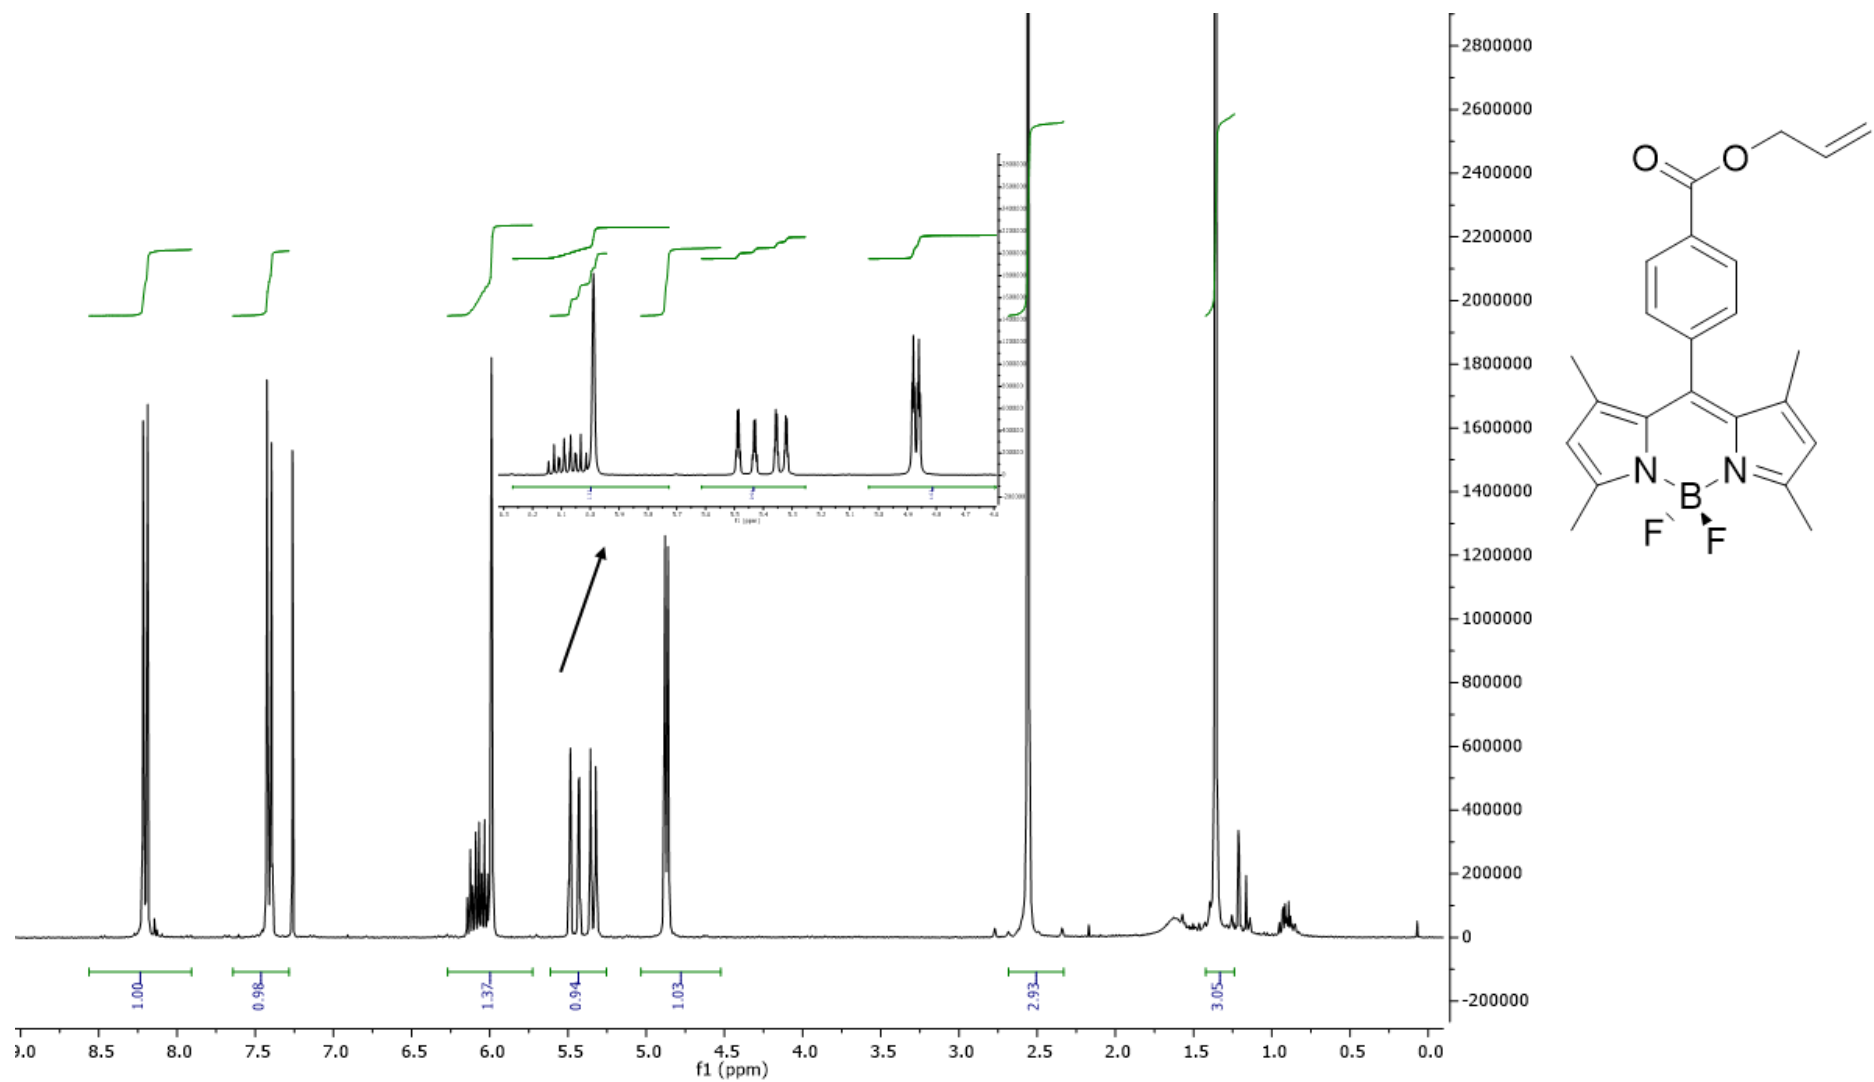

**Figure S28.** A 300 MHz <sup>1</sup>H NMR spectrum of **BD3** recorded in CDCl<sub>3</sub>.

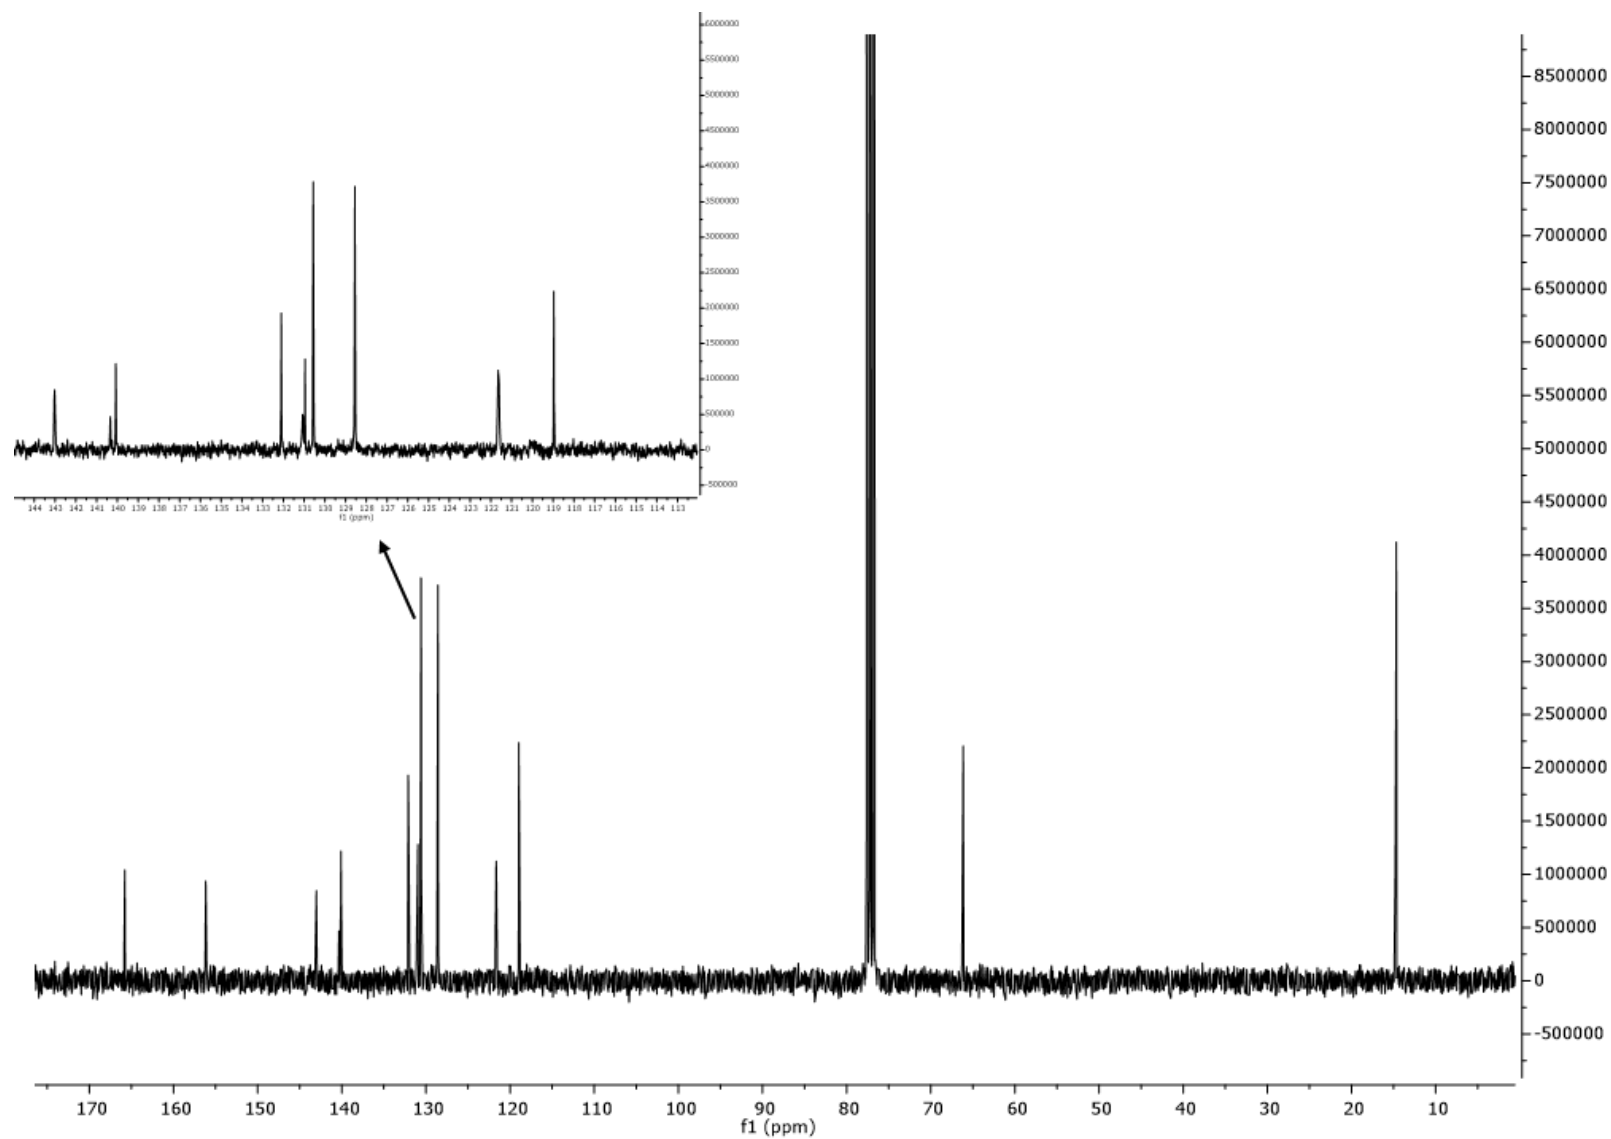

**Figure S29.** A 75 MHz  $^{13}\text{C}\{^1\text{H}\}$  NMR spectrum of **BD3** recorded in  $\text{CDCl}_3$ .

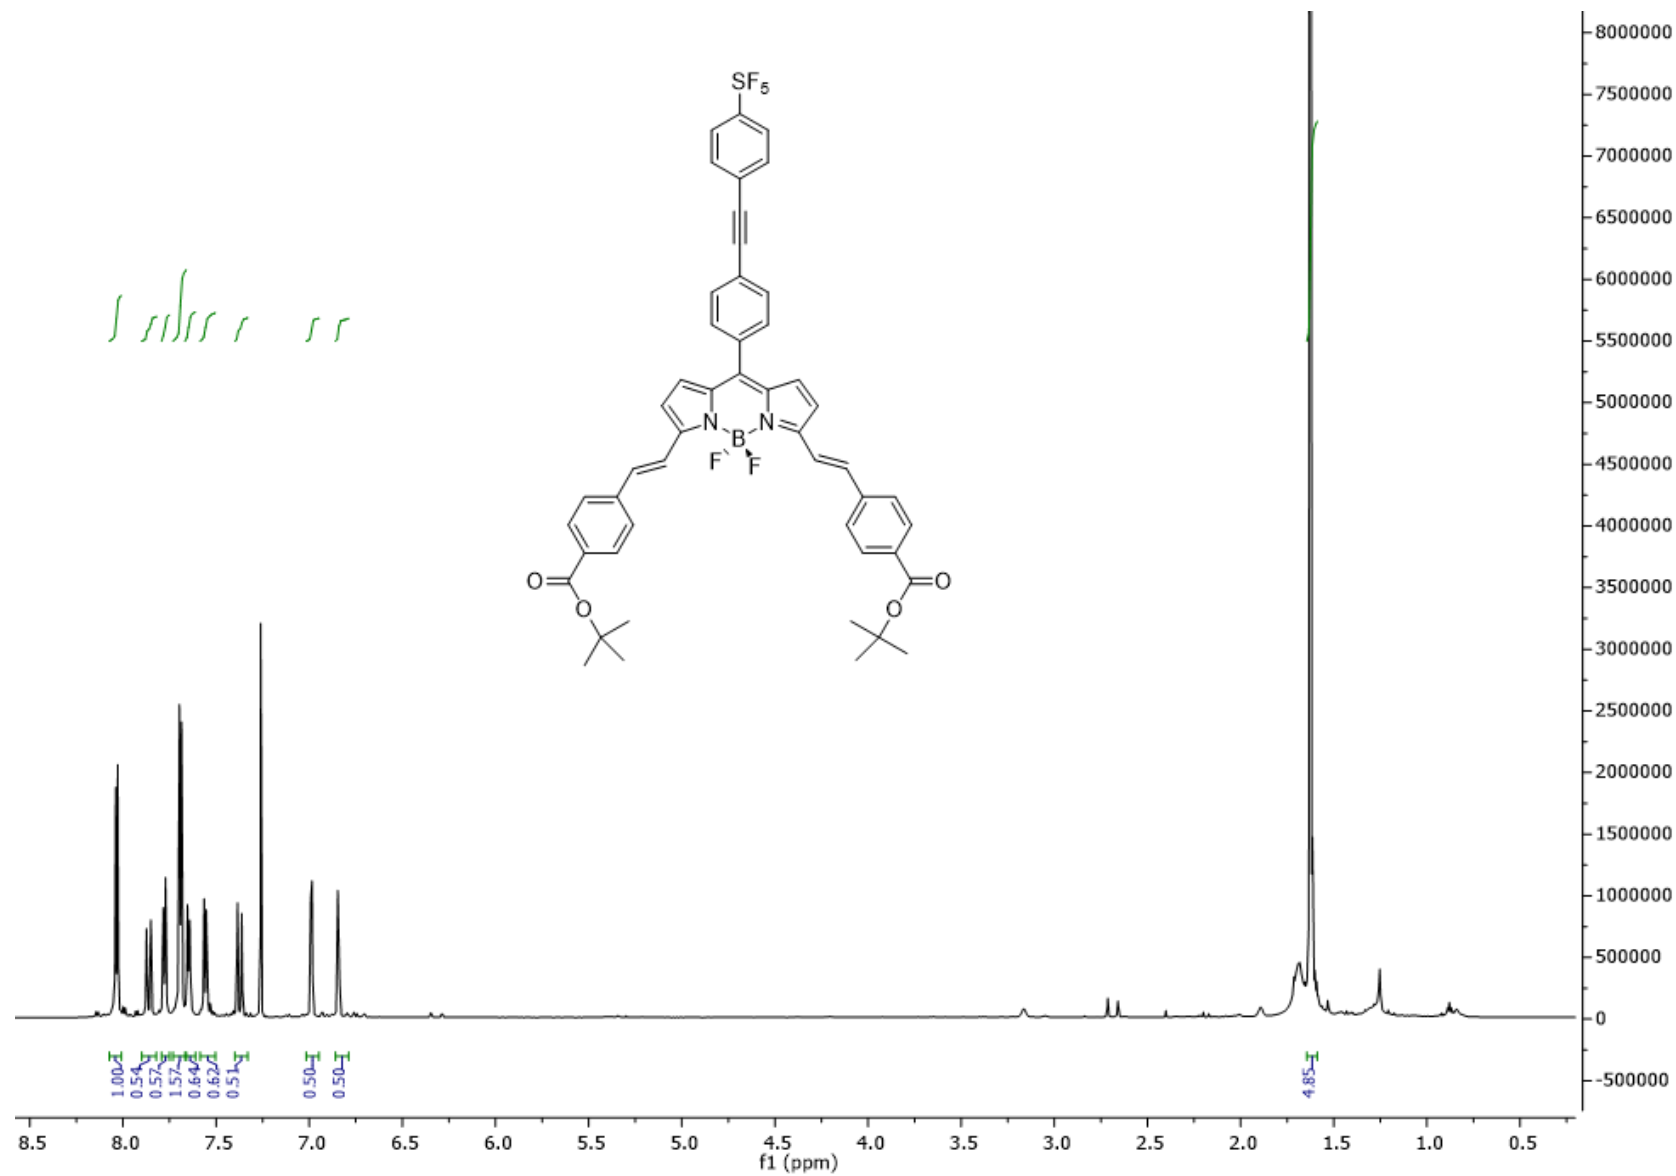

**Figure S30.** A 700 MHz <sup>1</sup>H NMR spectrum of **BD5** recorded in CDCl<sub>3</sub>.

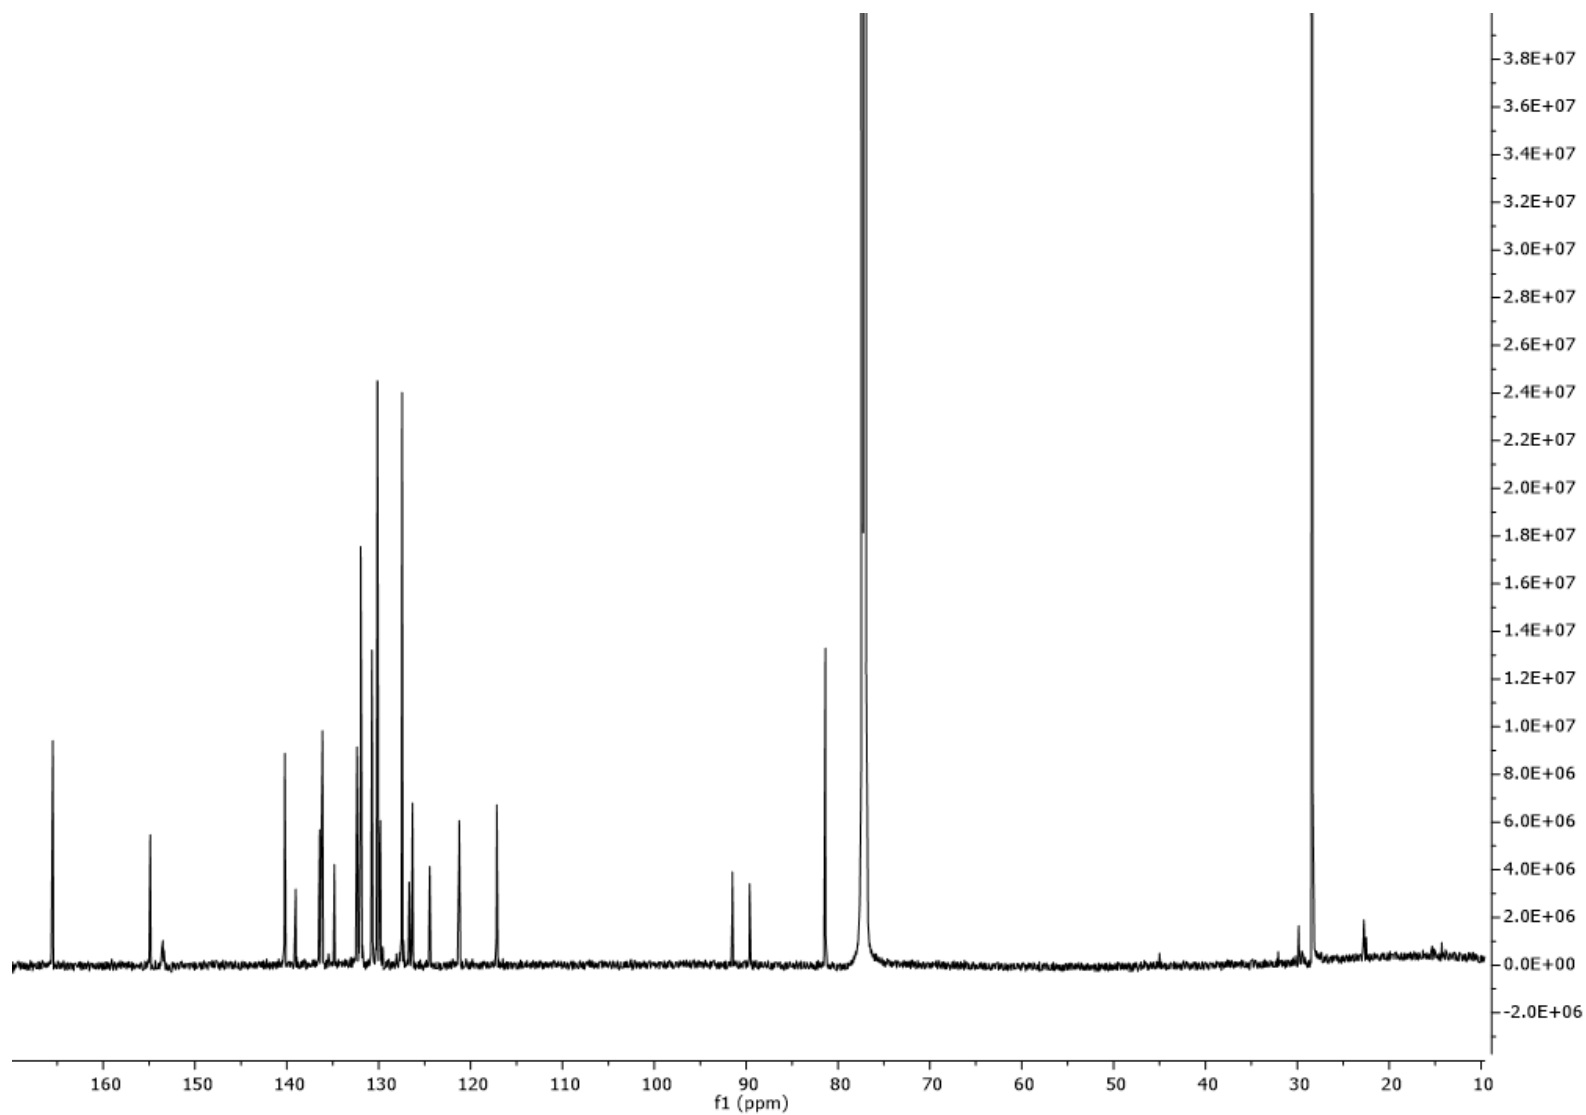

**Figure S31.** A 176 MHz  $^{13}\text{C}\{^1\text{H}\}$  NMR spectrum of **BD5** recorded in  $\text{CDCl}_3$ .

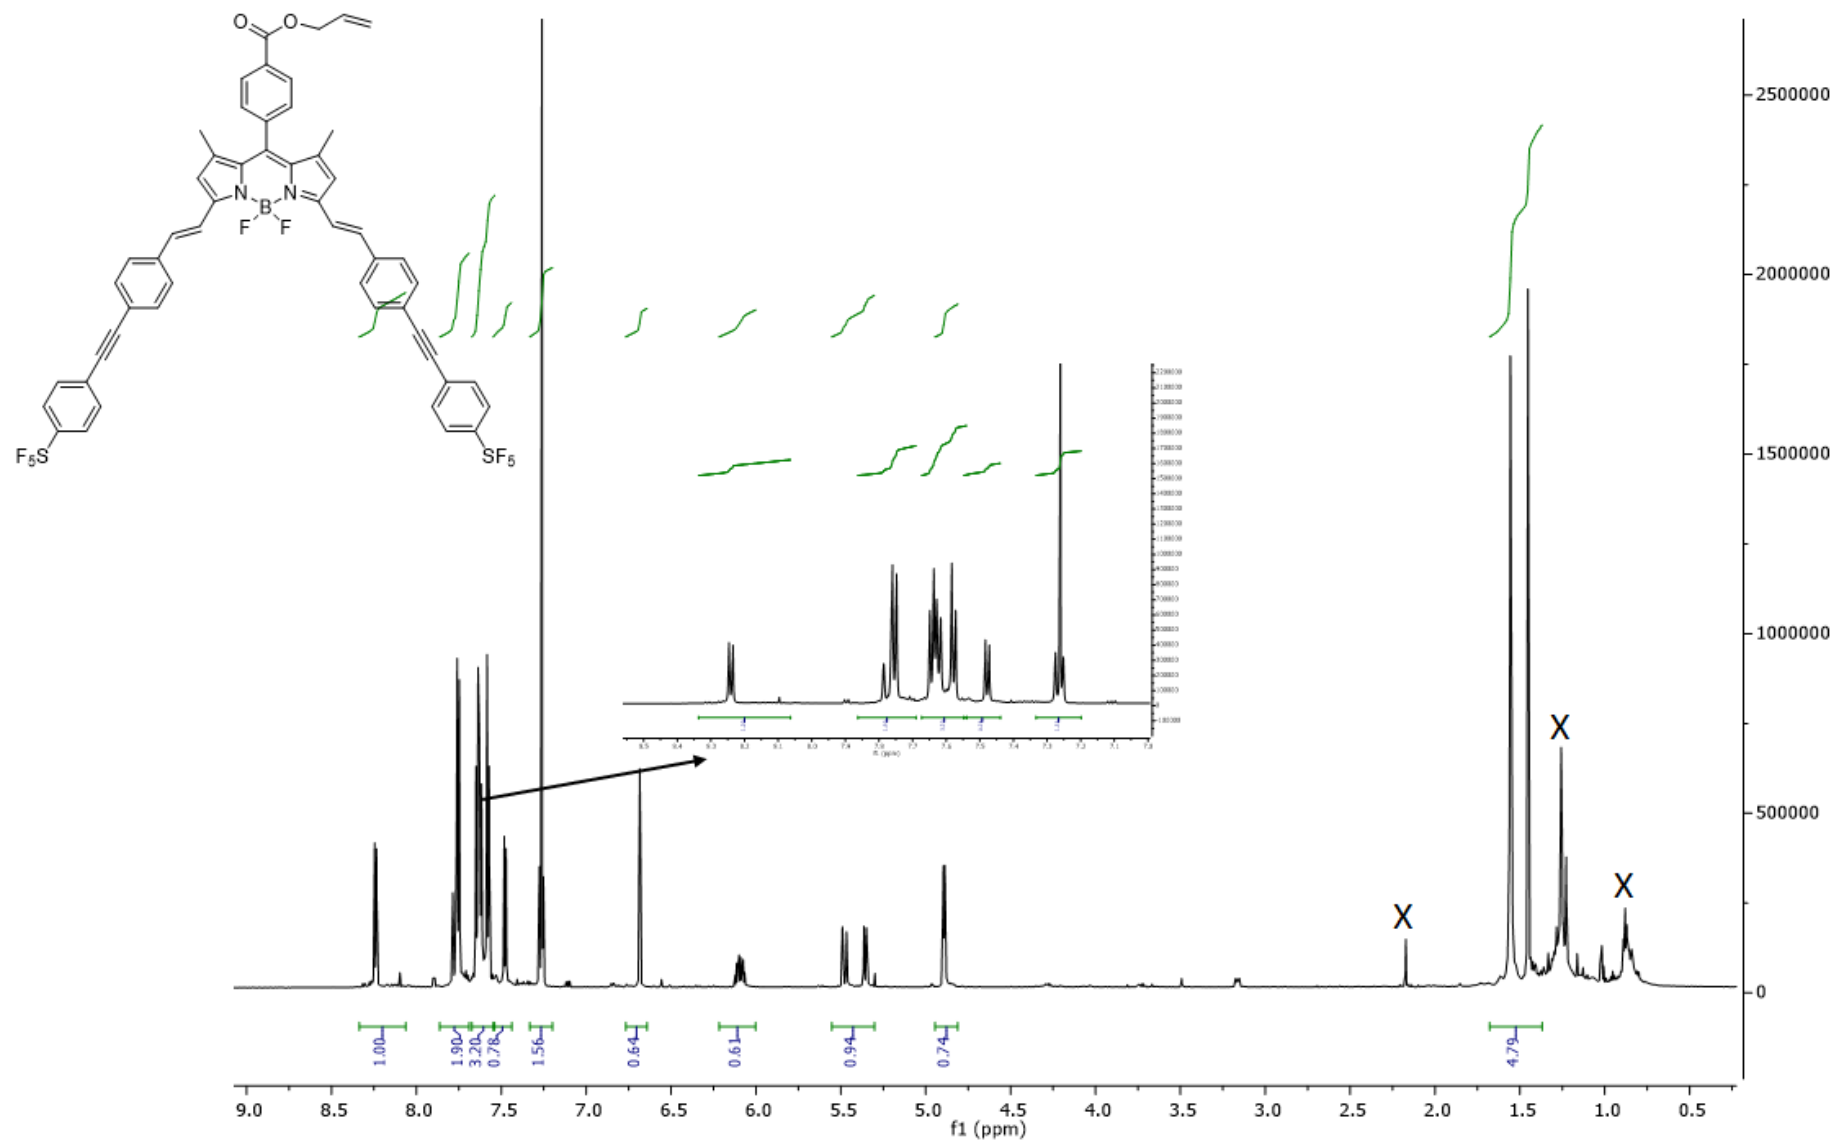

**Figure S32.** A 700 MHz  $^1\text{H}$  NMR spectrum of **BD6** recorded in  $\text{CDCl}_3$ . X = trace solvent peaks from acetone and petrol.

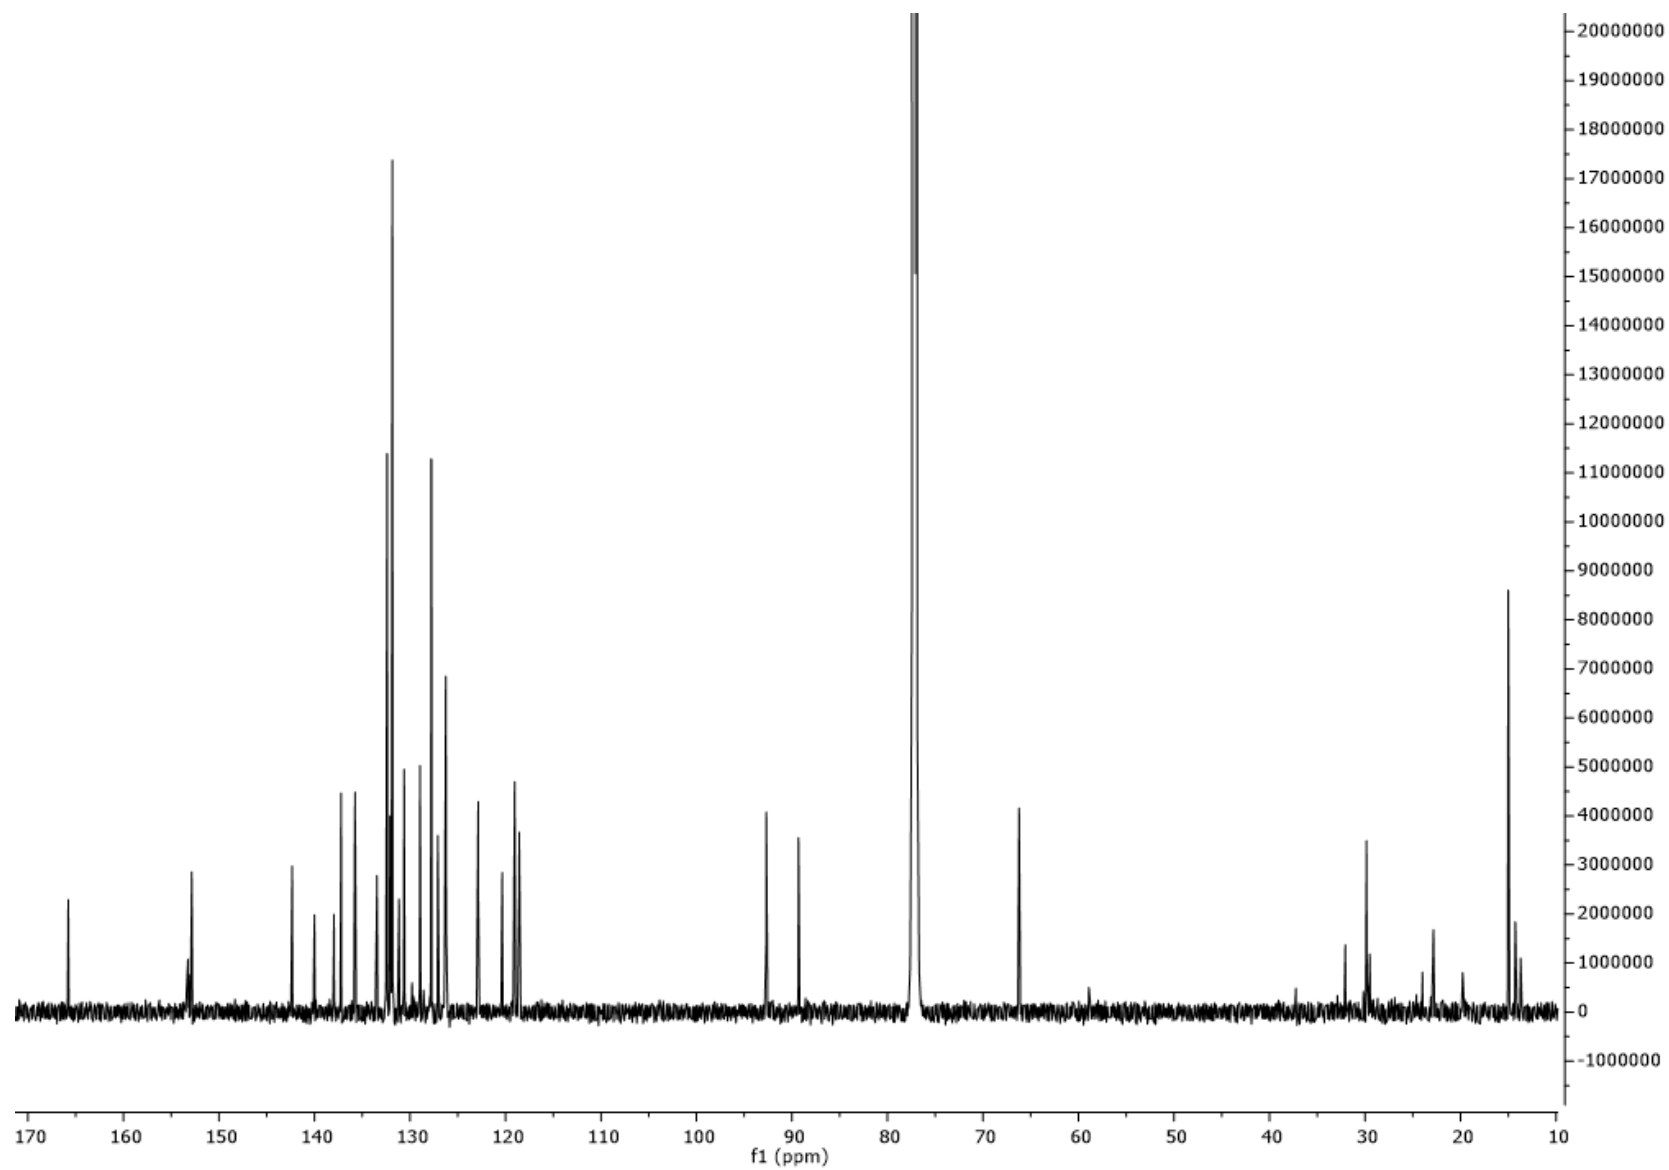

**Figure S33.** A 176 MHz  $^{13}\text{C}\{^1\text{H}\}$  NMR spectrum of **BD6** recorded in  $\text{CDCl}_3$ .

B06.2.1.1r  
B06  
19F  
CDCl3  
700 MHz  
298K

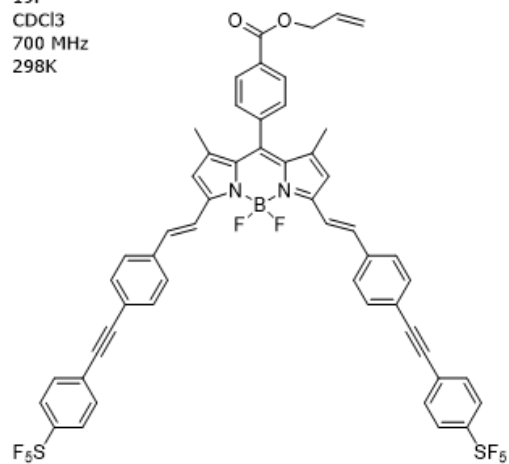

B06.2.1.1r  
B06  
19F  
CDCl3  
700 MHz  
298K

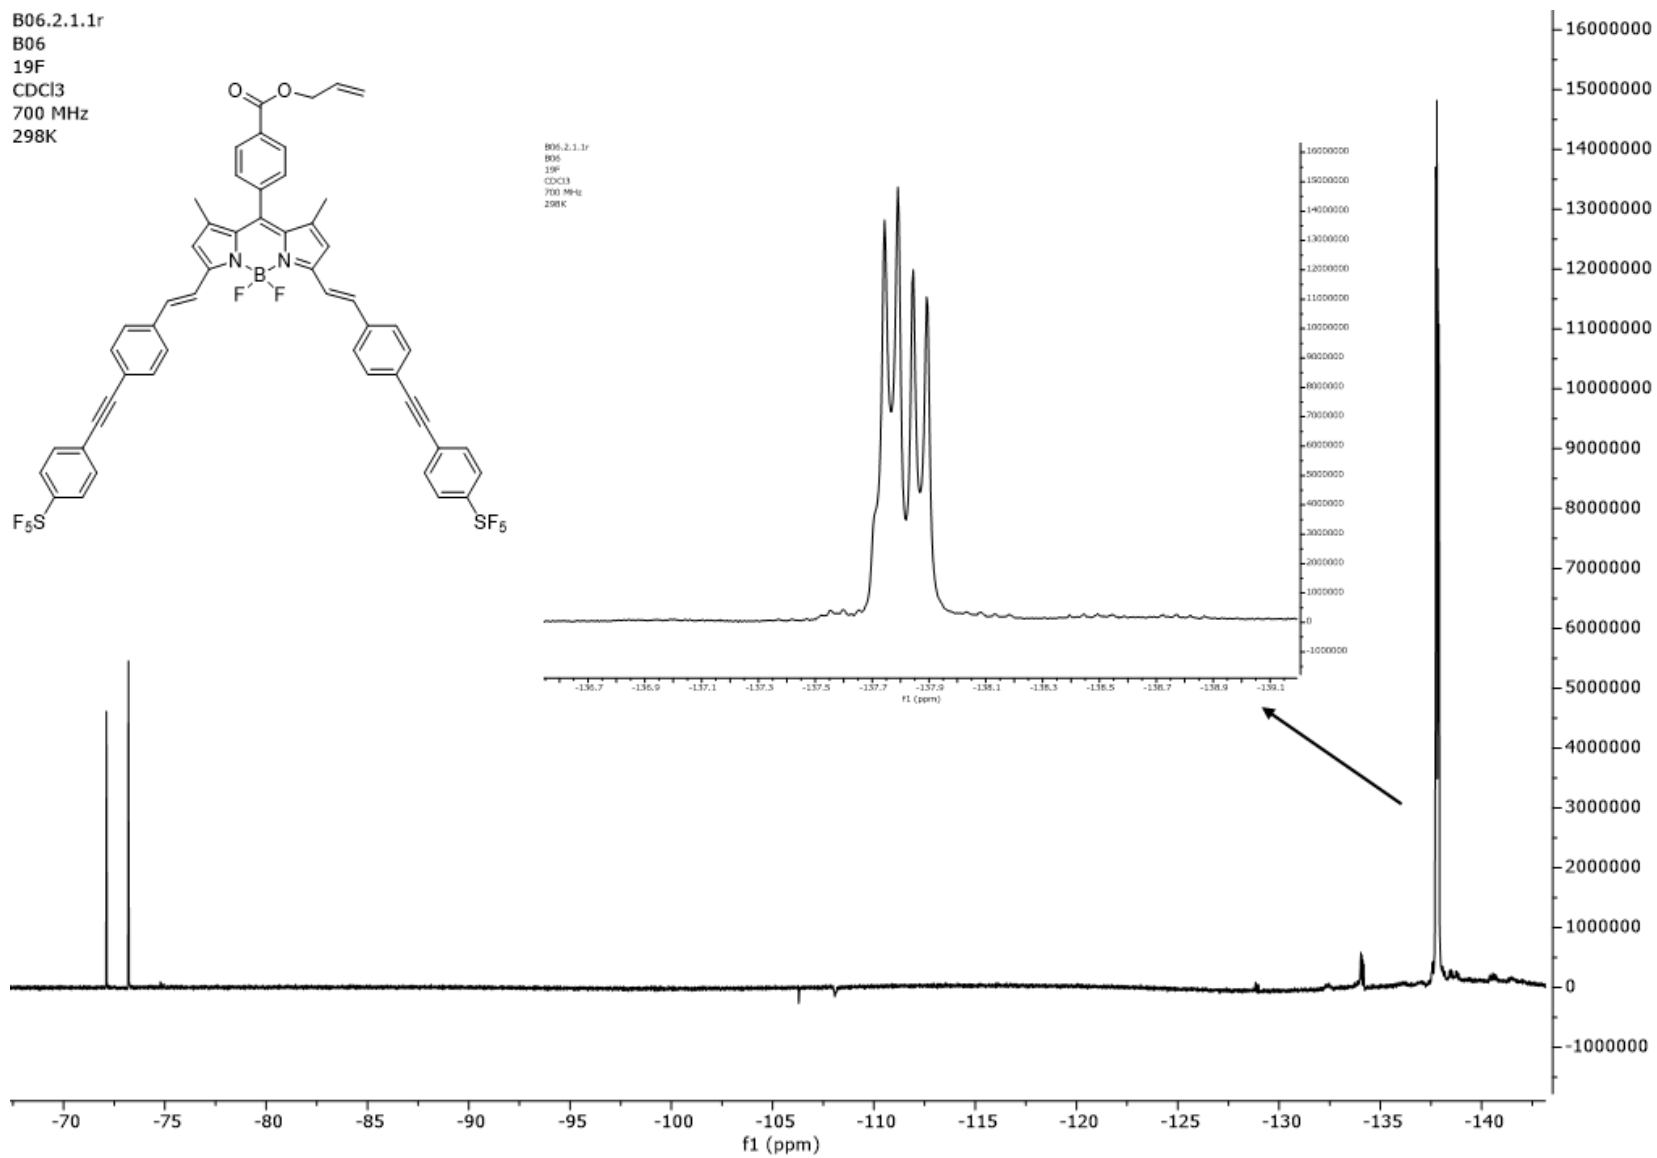

**Figure S34.** A 659 MHz  $^{19}\text{F}$  NMR spectrum of **BD6** recorded in  $\text{CDCl}_3$ .

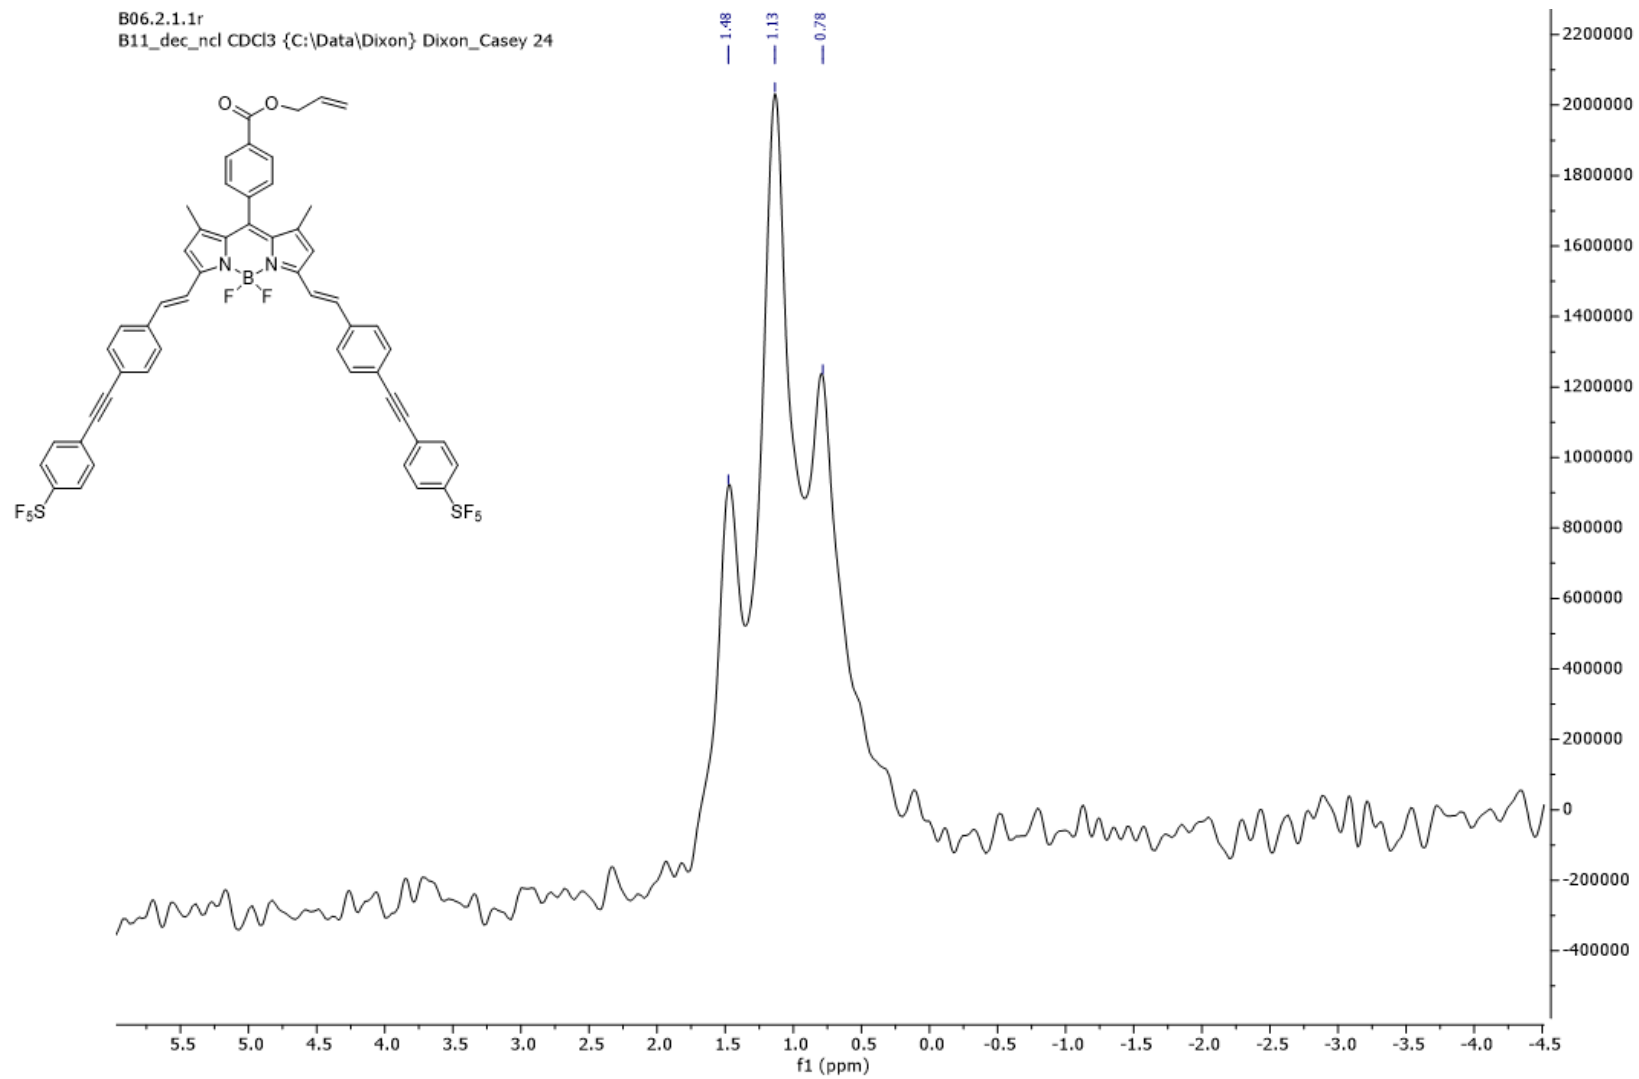

**Figure S35.** A 96 MHz  $^{11}\text{B}$  NMR spectrum of **BD6** recorded in  $\text{CDCl}_3$ .



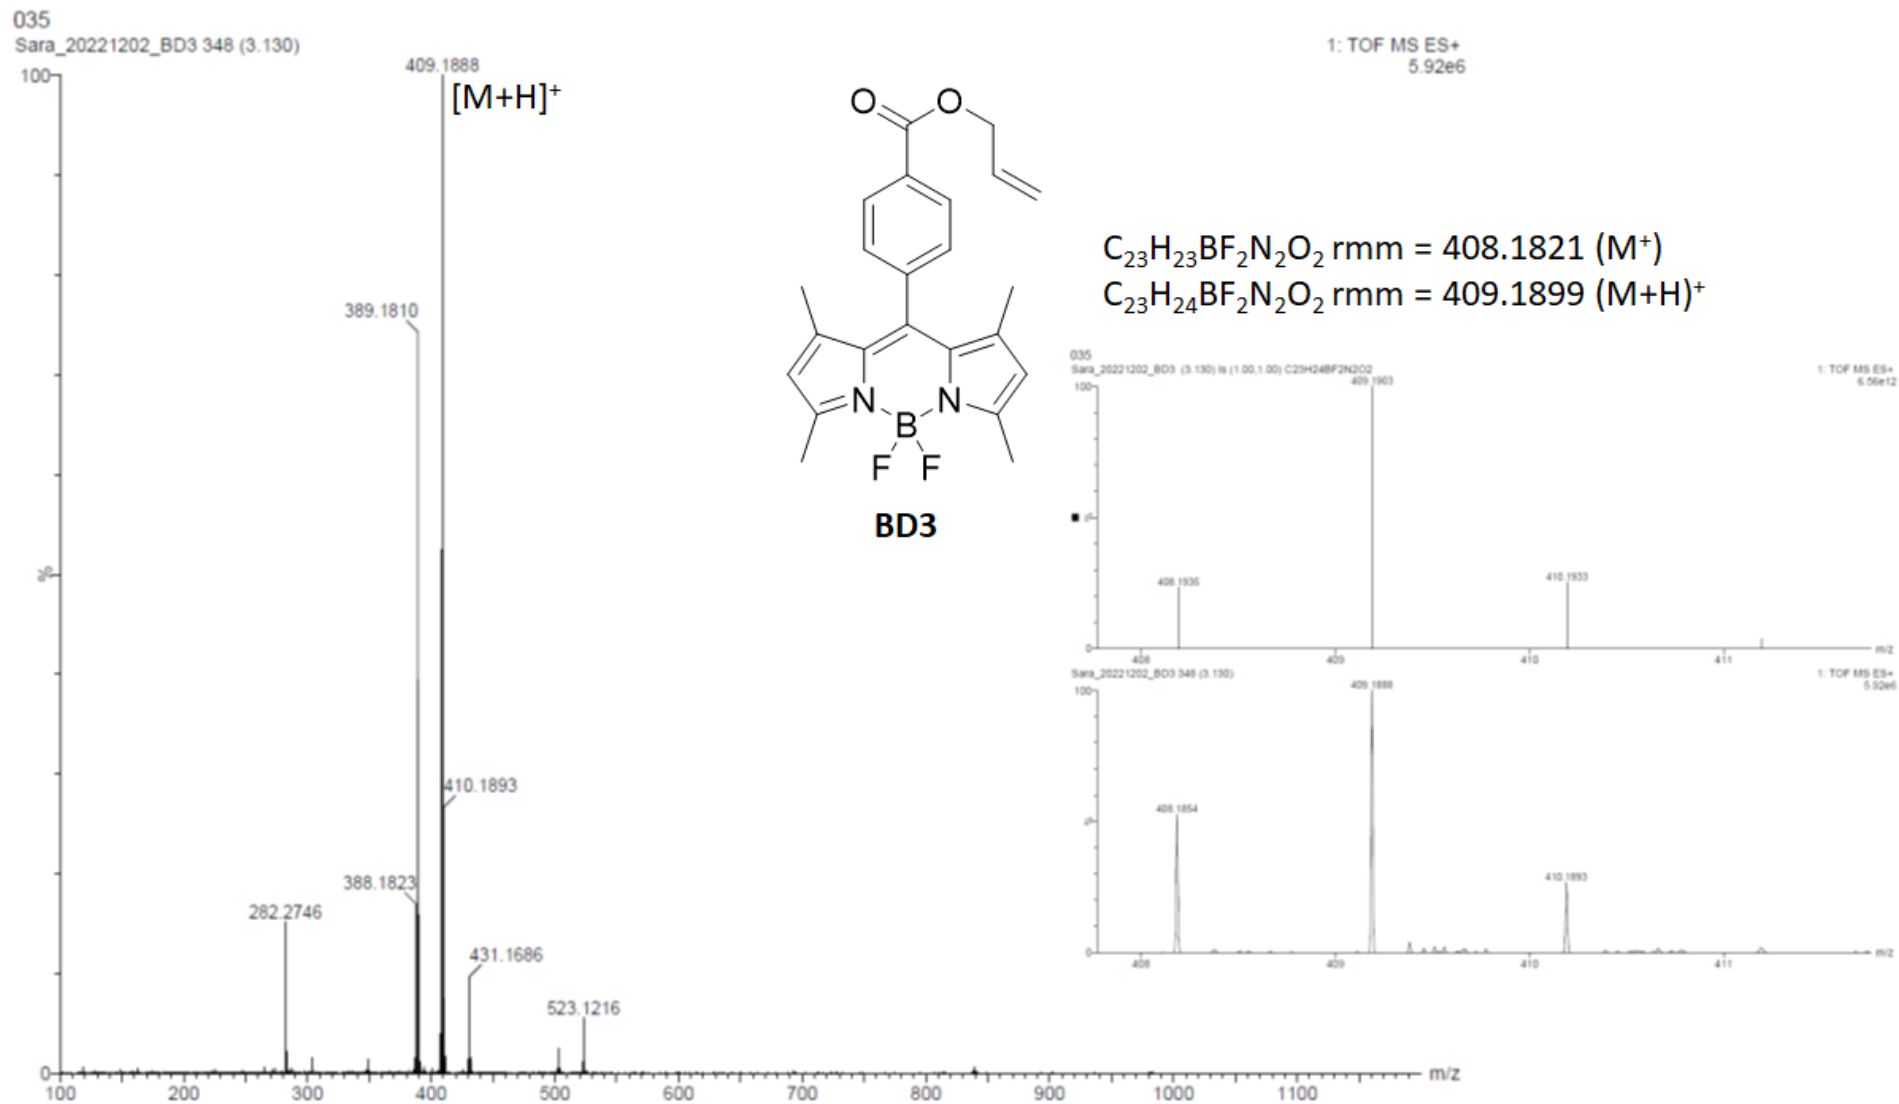

**Figure S36.** TOF mass spectrum of **BD3** and the comparison of calculated and observed data.

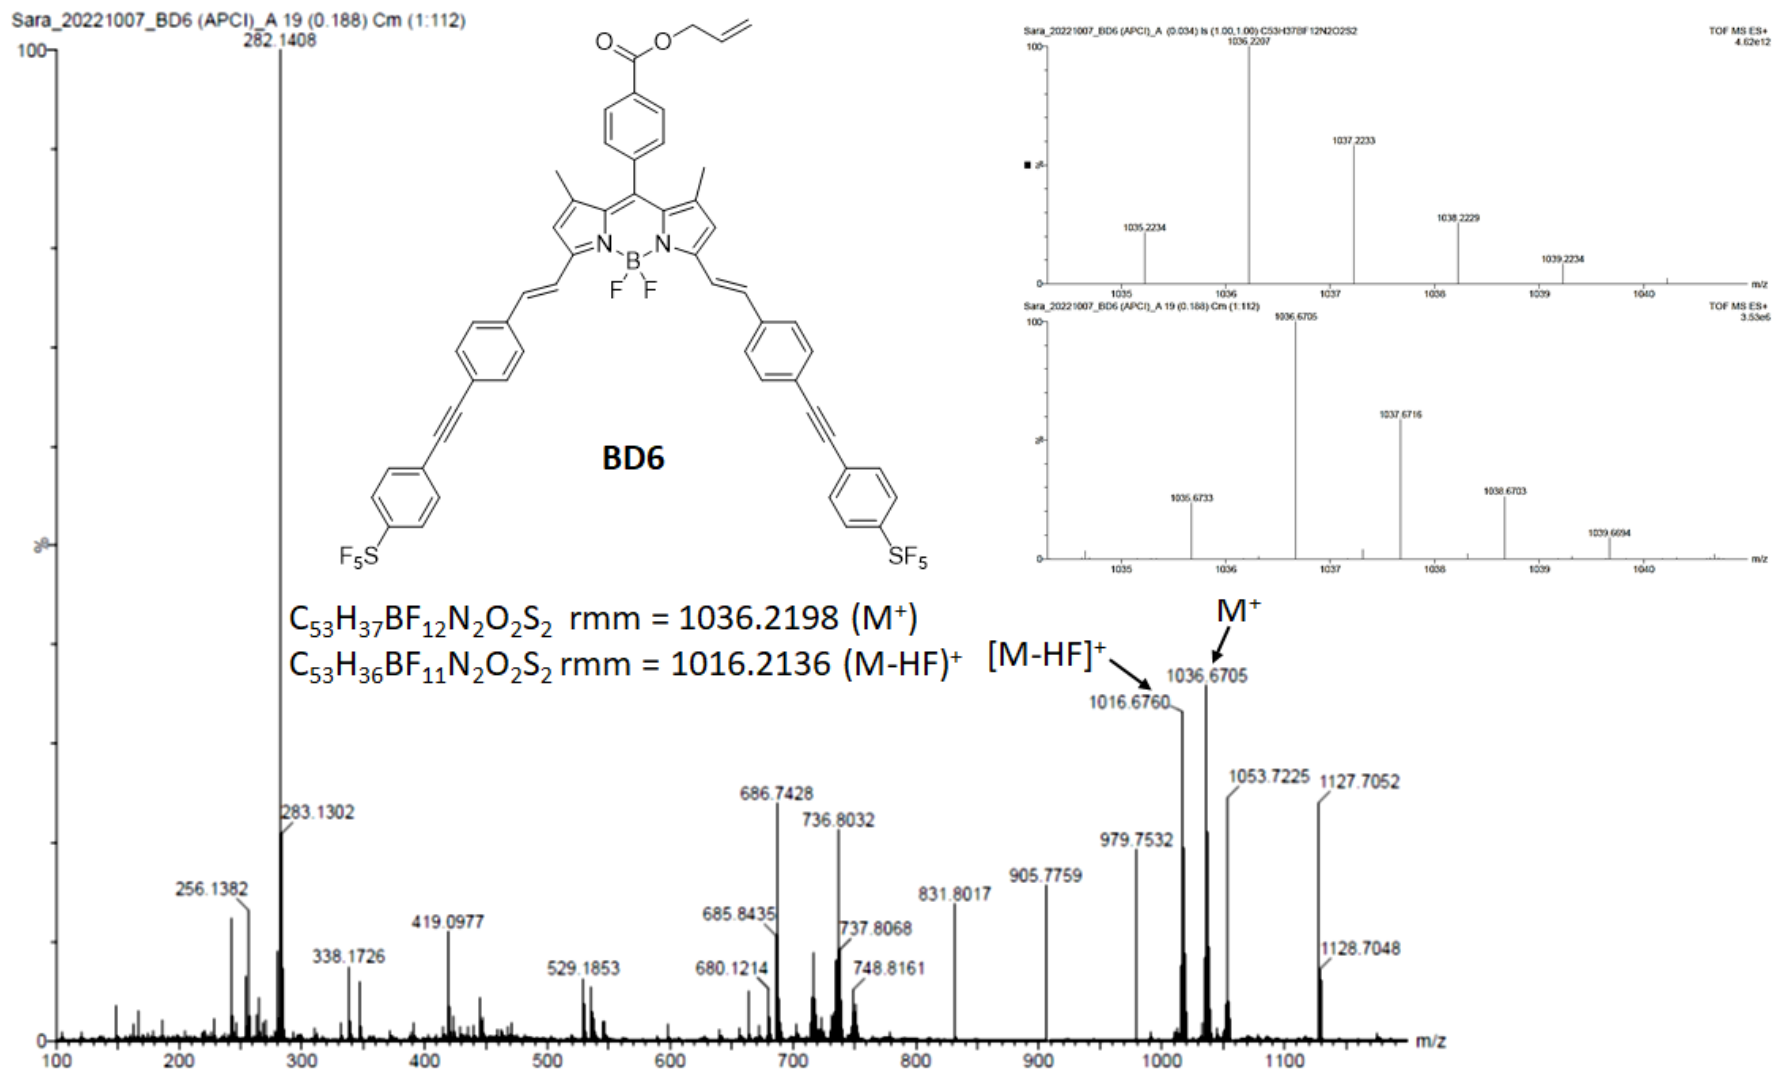

**Figure S37.** TOF mass spectrum of **BD6** and the comparison of calculated and observed data.
